# Supplementary material for: Genomic Diversity Profiling and Breed-Specific Evolutionary Signatures of Selection in Arunachali Yak
Source: MDPI journal article supplement (doi:10.3390/genes13020254), 2022-01-28
Supplement: s1 [file s1]

Supplementary Table 2: Trends of Effective population size (Ne) in the population across past >100 generations

| <b>Generations ago</b> | <b>Ne</b> | <b>Distance</b> | <b>r<sup>2</sup></b> |
|------------------------|-----------|-----------------|----------------------|
| 13                     | 83        | 3749154         | 0.076                |
| 15                     | 93        | 3273719         | 0.077                |
| 17                     | 107       | 2844241         | 0.077                |
| 20                     | 122       | 2459704         | 0.078                |
| 23                     | 140       | 2116074         | 0.078                |
| 27                     | 160       | 18113591        | 0.080                |
| 32                     | 185       | 1541240         | 0.081                |
| 38                     | 212       | 1303191         | 0.083                |
| 45                     | 246       | 1095172         | 0.085                |
| 54                     | 285       | 914080          | 0.087                |
| 66                     | 330       | 757781          | 0.091                |
| 80                     | 379       | 623533          | 0.095                |
| 98                     | 446       | 509479          | 0.099                |
| 121                    | 518       | 413329          | 0.104                |

Supplementary Table 3: Estimates of Runs of Homozygosity (ROH) and Inbreeding coefficient based on ROH (F<sub>ROH</sub>) in the population

| <b>Sample</b> | <b>No. of ROH</b> | <b>F<sub>ROH</sub></b> |
|---------------|-------------------|------------------------|
| 1             | 447               | 0.177                  |
| 2             | 243               | 0.071                  |
| 3             | 316               | 0.090                  |
| 4             | 455               | 0.190                  |
| 5             | 499               | 0.180                  |
| 6             | 398               | 0.148                  |
| 7             | 438               | 0.158                  |
| 8             | 444               | 0.169                  |
| 9             | 200               | 0.060                  |
| 10            | 464               | 0.179                  |
| 11            | 532               | 0.219                  |
| 12            | 427               | 0.169                  |
| 13            | 342               | 0.122                  |
| 14            | 345               | 0.120                  |
| 15            | 317               | 0.110                  |
| 16            | 363               | 0.128                  |
| 17            | 487               | 0.165                  |
| 18            | 203               | 0.058                  |
| 19            | 137               | 0.035                  |
| Average       | 371.42            | 0.134                  |

Supplementary Table 4: Genomic inbreeding coefficients based on ROH ( $F_{ROH}$ ) for segments of different lengths in the individuals of the population

| <b>Sample</b> | <b><math>F_{ROH}</math> (0-2 Mb)</b> | <b><math>F_{ROH}</math> (2-4 Mb)</b> | <b><math>F_{ROH}</math> (4-8 Mb)</b> | <b><math>F_{ROH}</math> (&gt;8 Mb)</b> |
|---------------|--------------------------------------|--------------------------------------|--------------------------------------|----------------------------------------|
| 1             | 0.178                                | 0.044                                | 0.012                                | NA                                     |
| 2             | 0.071                                | 0.002                                | NA                                   | NA                                     |
| 3             | 0.090                                | 0.004                                | NA                                   | NA                                     |
| 4             | 0.190                                | 0.061                                | 0.031                                | 0.004                                  |
| 5             | 0.180                                | 0.030                                | 0.003                                | NA                                     |
| 6             | 0.149                                | 0.036                                | 0.010                                | NA                                     |
| 7             | 0.159                                | 0.029                                | 0.004                                | NA                                     |
| 8             | 0.170                                | 0.040                                | 0.013                                | NA                                     |
| 9             | 0.061                                | 0.005                                | 0.002                                | NA                                     |
| 10            | 0.179                                | 0.048                                | 0.016                                | 0.003                                  |
| 11            | 0.220                                | 0.063                                | 0.016                                | 0.003                                  |
| 12            | 0.169                                | 0.043                                | 0.020                                | NA                                     |
| 13            | 0.123                                | 0.022                                | 0.009                                | NA                                     |
| 14            | 0.120                                | 0.015                                | 0.003                                | NA                                     |
| 15            | 0.110                                | 0.022                                | 0.005                                | NA                                     |
| 16            | 0.129                                | 0.021                                | 0.005                                | NA                                     |
| 17            | 0.165                                | 0.024                                | NA                                   | NA                                     |
| 18            | 0.058                                | 0.004                                | NA                                   | NA                                     |
| 19            | 0.036                                | NA                                   | NA                                   | NA                                     |
