# Supplementary material for: Genomic Diversity Profiling and Breed-Specific Evolutionary Signatures of Selection in Arunachali Yak
Source: MDPI journal article supplement (doi:10.3390/genes13020254), 2022-01-28
Supplement: s1 [file s1]

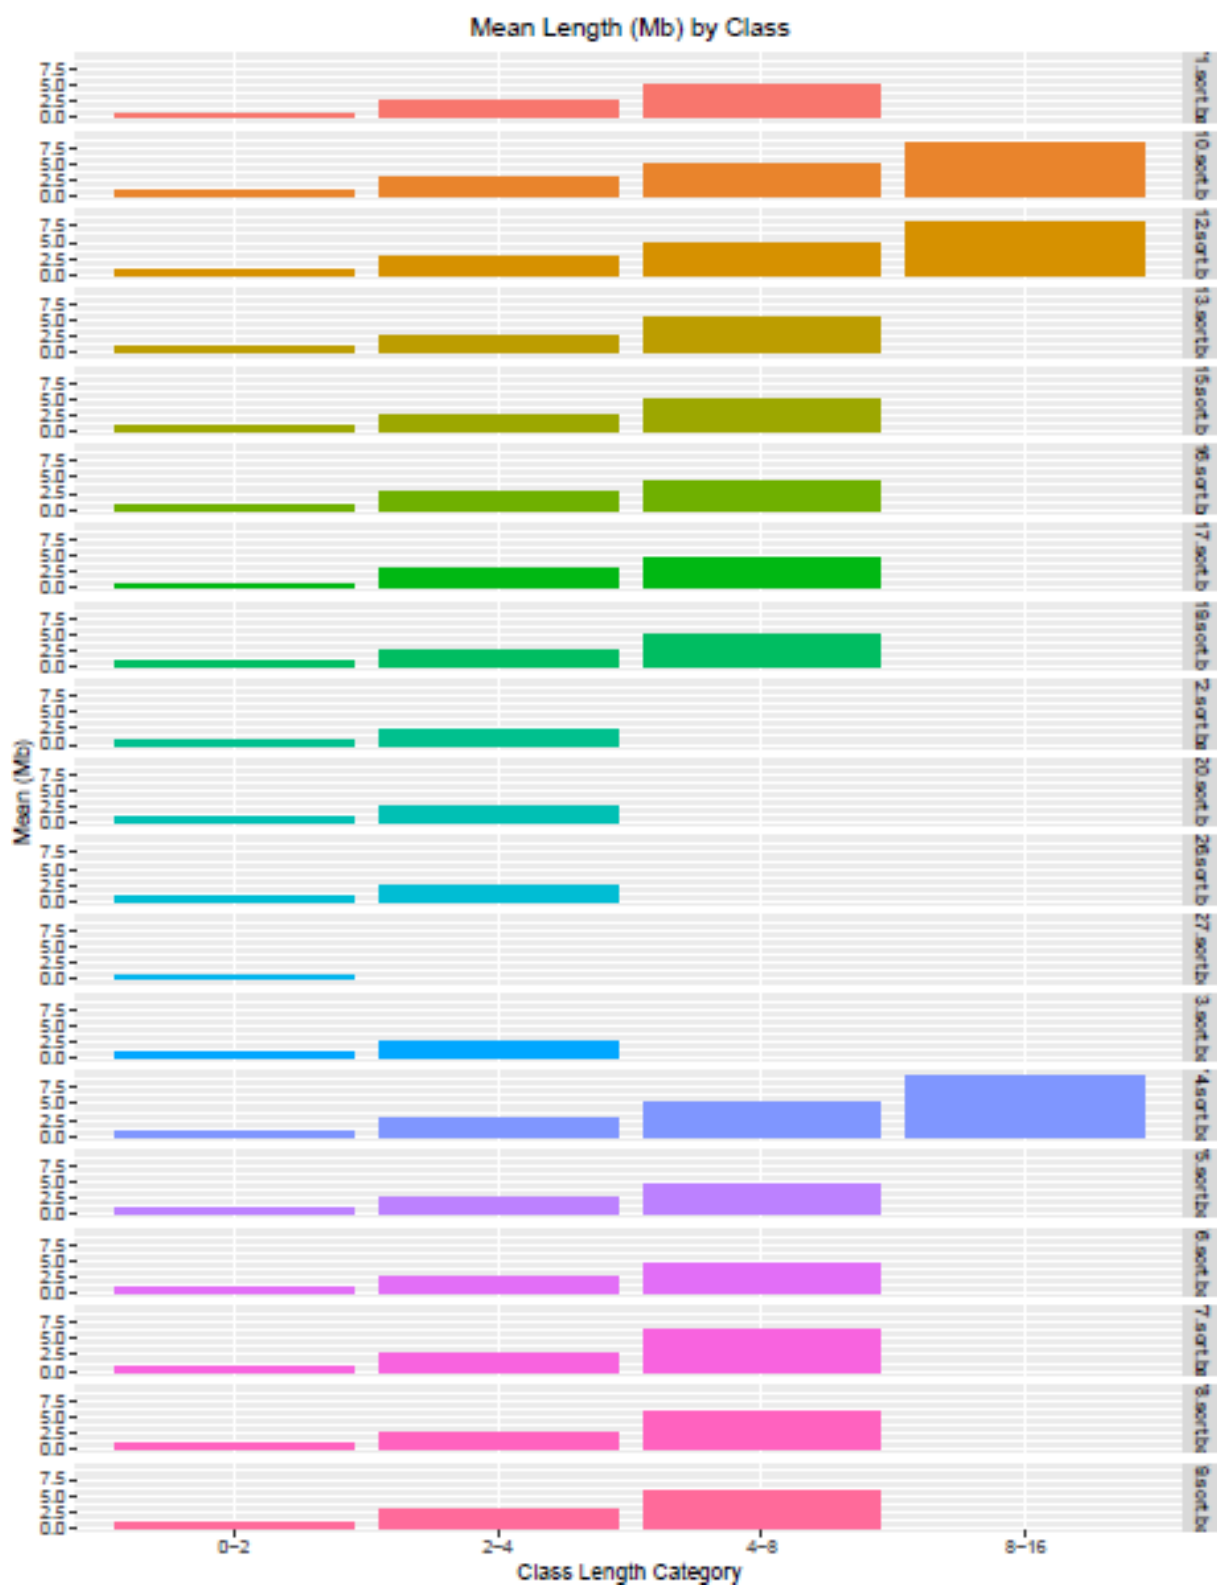

Suppl. Figure 1: Distribution of mean ROH lengths across different categories in different individuals

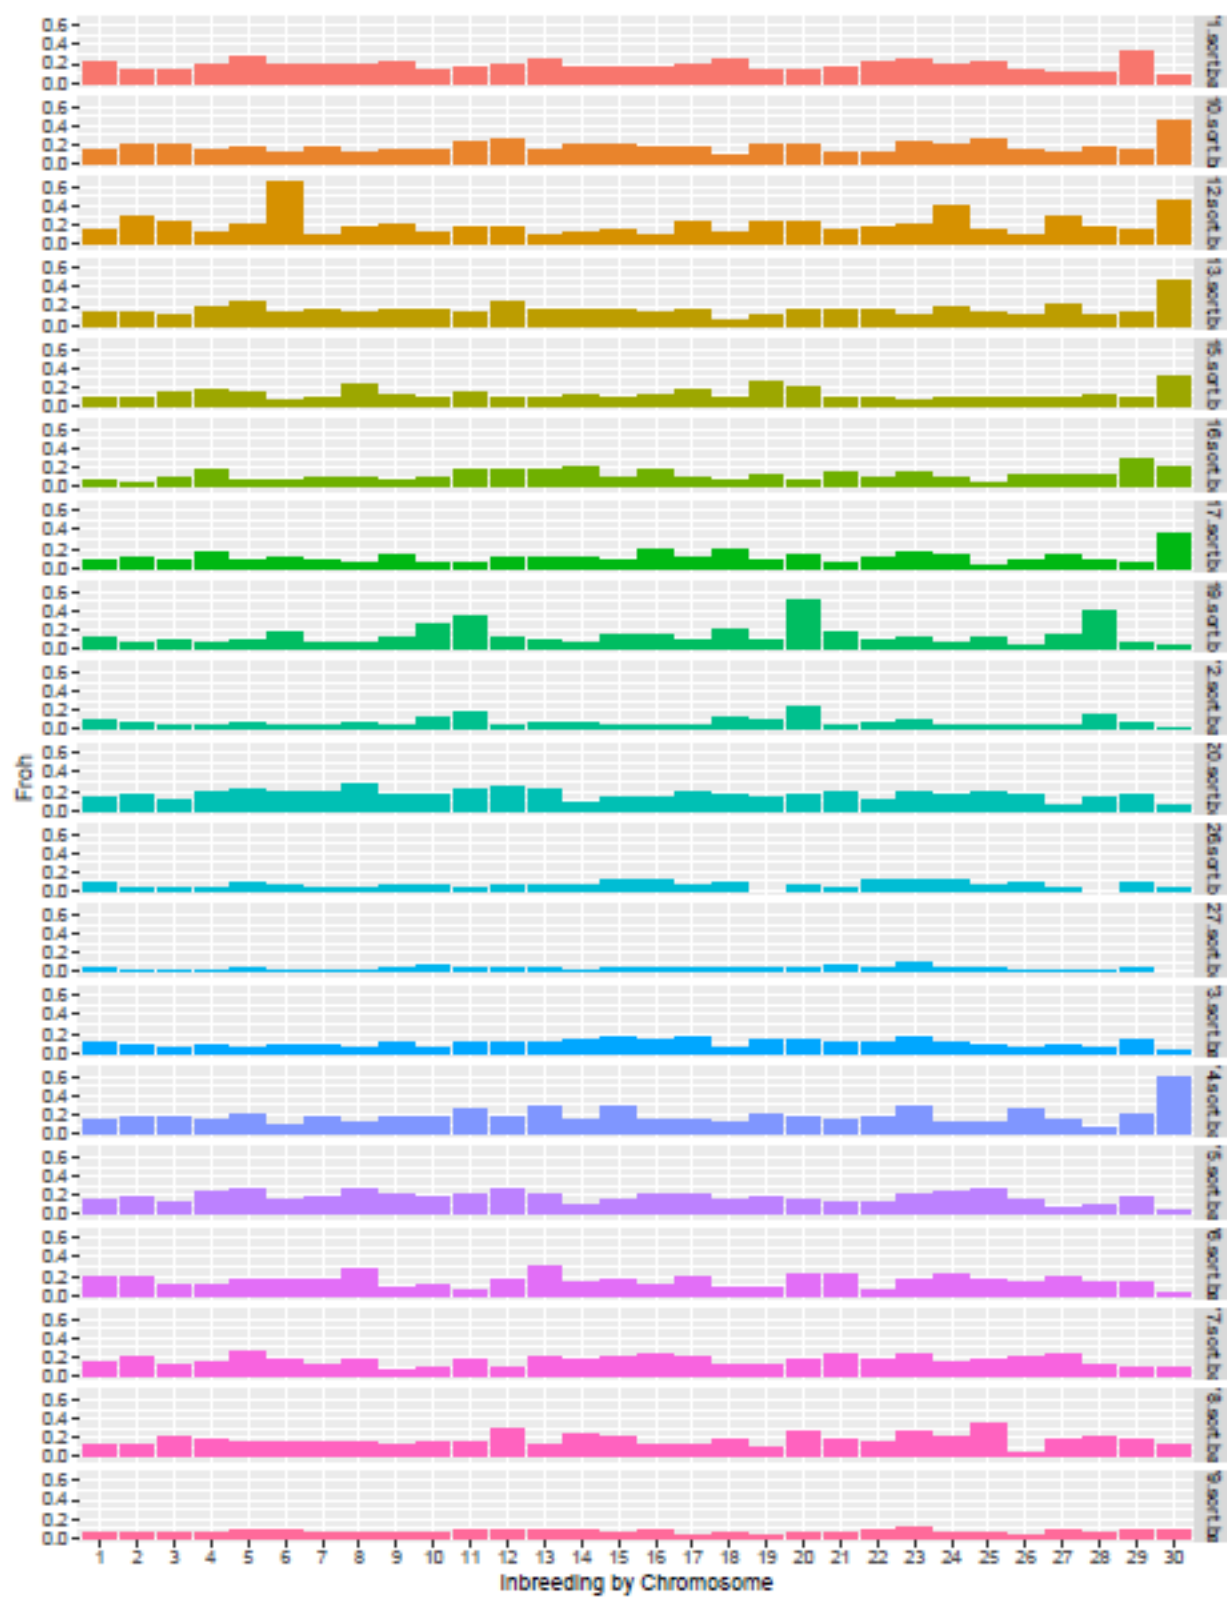

Suppl. Figure 2:  $F_{ROH}$  estimates across different chromosomes in different individuals of the population
