# Supplementary material for: Genomic Diversity Profiling and Breed-Specific Evolutionary Signatures of Selection in Arunachali Yak
Source: Genes (Basel). 2022 Jan 28;13(2):254. doi: 10.3390/genes13020254 (PMC8872319; doi:10.3390/genes13020254)
Supplement: Supplementary file 1 [file genes-13-00254-s001.zip]

Archive with 5 entries (5 files):
- SUPPL. FIGURES.pdf
- SUPPLEMENTARY TABLE 1.xlsx
- SUPPLEMENTARY TABLE 5.xlsx
- SUPPLEMENTARY TABLE 6.xlsx
- SUPPLEMENTARY TABLES 2-4.pdf
