# Supplementary material for: Genomic Diversity Profiling and Breed-Specific Evolutionary Signatures of Selection in Arunachali Yak
Source: Genes (Basel). 2022 Jan 28;13(2):254. doi: 10.3390/genes13020254 (PMC8872319; doi:10.3390/genes13020254)
Supplement: Supplementary file 1 [file genes-13-00254-s001.zip › SUPPLEMENTARY TABLE 1.xlsx]

## Sheet: Sheet1
Location	Gene Symbol	Protein_position	Existing_variation	SIFT
1:5628118-5628118	KRTAP27-1	114	-	deleterious(0.03)
1:42417794-42417794	OR5H28	161	rs384228274	deleterious(0.01)
1:71419341-71419341	PIGZ	3	-	deleterious(0.01)
1:91499617-91499617	NAALADL2	685	-	deleterious(0)
1:91499617-91499617	NAALADL2	721	-	deleterious(0)
1:116288867-116288867	-	49	-	deleterious(0.02)
1:119026223-119026223	HPS3	425	-	deleterious(0.05)
10:25266691-25266691	-	90	rs135936368,rs42892671	deleterious(0.02)
10:26301579-26301579	-	170	rs524230773	deleterious(0.01)
10:26301735-26301735	-	118	-	deleterious(0.01)
10:26724417-26724417	TEP1	547	rs716748217	deleterious(0.03)
10:27784384-27784384	OR4G2	108	-	deleterious(0.01)
10:27784458-27784458	OR4G2	133	rs208057369	deleterious(0.01)
10:76193431-76193431	SYNE2	1358	-	deleterious(0.02)
11:19280490-19280490	VIT	609	rs431940072	deleterious(0.04)
11:19280490-19280490	VIT	613	rs431940072	deleterious(0.05)
11:26189128-26189128	LRPPRC	240	-	deleterious(0)
11:37984446-37984446	MTIF2	307	-	deleterious(0)
11:40780425-40780425	VRK2	326	-	deleterious(0.01)
11:94223617-94223617	-	48	-	deleterious(0.02)
11:99169962-99169962	DYNC2I2	145	-	deleterious(0.04)
13:62369396-62369396	BPIFB3	405	rs136829443	deleterious(0.03)
15:35301606-35301606	-	147	-	deleterious(0)
15:37634447-37634447	CALCA	113	-	deleterious(0.01)
15:48379002-48379002	HBE1	84	rs208925826	deleterious(0)
15:48379034-48379034	HBE1	94	-	deleterious(0)
15:48379046-48379046	HBE1	98	-	deleterious(0.02)
15:78638194-78638194	OR5T1	140	rs722730789	deleterious(0.04)
16:2878814-2878814	RBBP5	278	-	deleterious(0)
16:27320938-27320938	FBXO28	111	rs475109571	deleterious(0)
16:35024178-35024178	WDR64	931	-	deleterious(0.03)
16:54940123-54940123	PRDX6	165	-	deleterious(0)
16:76603023-76603023	DENND1B	200	rs454795551	deleterious(0.03)
16:76603023-76603023	DENND1B	220	rs454795551	deleterious(0.02)
17:7573792-7573792	DCLK2	644	-	deleterious(0.03)
17:7573792-7573792	DCLK2	650	-	deleterious(0.03)
17:7573792-7573792	DCLK2	645	-	deleterious(0.03)
17:70290186-70290186	SFI1	342	-	deleterious(0.01)
17:70290186-70290186	SFI1	260	-	deleterious(0.01)
17:70982654-70982654	ZNF280B	493	-	deleterious(0)
17:70982670-70982670	ZNF280B	488	-	deleterious(0)
17:70982812-70982812	ZNF280B	441	rs133191936,rs438311132,rs801275661	deleterious(0.04)
17:70982841-70982841	ZNF280B	431	rs133514251	deleterious(0)
17:71001030-71001030	ZNF280A	265	rs134293200	deleterious(0)
17:71001030-71001030	ZNF280A	276	rs134293200	deleterious(0)
17:71001035-71001035	ZNF280A	263	-	deleterious(0.02)
17:71001035-71001035	ZNF280A	274	-	deleterious(0)
18:4535525-4535525	ADAMTS18	1028	-	deleterious(0.03)
18:23932173-23932173	SLC6A2	593	-	deleterious(0.03)
18:35340890-35340890	CENPT	298	rs436205273	deleterious(0)
18:35340890-35340890	CENPT	300	rs436205273	deleterious(0)
18:40237227-40237227	POP4	36	-	deleterious(0.01)
18:42987378-42987378	DPY19L3	607	-	deleterious(0)
18:42987378-42987378	DPY19L3	651	-	deleterious(0)
18:47071787-47071787	ZNF566	109	-	deleterious(0.04)
18:47071834-47071834	ZNF566	125	-	deleterious(0.05)
18:48354112-48354112	RYR1	4424	-	deleterious(0.05)
19:14449506-14449506	-	78	-	deleterious(0.05)
19:18093438-18093438	ATAD5	31	-	deleterious(0.02)
19:26735769-26735769	ALOX12E	558	-	deleterious(0.02)
19:58084983-58084983	C19H17orf80	555	-	deleterious(0)
2:10609398-10609398	FSIP2	703	-	deleterious(0.02)
2:59826416-59826416	THSD7B	861	rs209351890	deleterious(0.02)
2:59826416-59826416	THSD7B	835	rs209351890	deleterious(0.03)
2:59826416-59826416	THSD7B	818	rs209351890	deleterious(0.02)
2:59826416-59826416	THSD7B	847	rs209351890	deleterious(0.02)
2:59826416-59826416	THSD7B	841	rs209351890	deleterious(0.03)
2:62142859-62142859	RAB3GAP1	678	-	deleterious(0)
2:62142859-62142859	RAB3GAP1	638	-	deleterious(0)
2:127728495-127728495	SYF2	121	-	deleterious(0.01)
2:127728495-127728495	SYF2	112	-	deleterious(0.01)
20:8100218-8100218	-	21	-	deleterious(0)
21:21786482-21786482	FURIN	245	-	deleterious(0.05)
21:34418651-34418651	-	126	-	deleterious(0.02)
21:41985853-41985853	GPR33	60	-	deleterious(0.01)
22:12466135-12466135	TTC21A	22	rs717126532	deleterious(0.02)
22:16780896-16780896	FANCD2	185	-	deleterious(0.02)
22:28383133-28383133	PDZRN3	162	-	deleterious(0.01)
22:28383133-28383133	PDZRN3	222	-	deleterious(0.01)
22:48171072-48171072	GNL3	295	-	deleterious(0)
22:48171072-48171072	GNL3	296	-	deleterious(0)
23:25190042-25190042	GSTA3	79	-	deleterious(0.04)
23:25190048-25190048	GSTA3	77	-	deleterious(0.05)
23:29204031-29204031	OR12D2G	241	rs516955459	deleterious(0.01)
23:47402325-47402325	BLOC1S5	105	-	deleterious(0.03)
23:50077569-50077569	FAM217A	163	-	deleterious(0.01)
23:50077587-50077587	FAM217A	169	-	deleterious(0.03)
24:25604759-25604759	DSG2	938	-	deleterious(0.05)
24:38886651-38886651	EPB41L3	828	-	deleterious(0.05)
24:45391271-45391271	SLC14A2	755	-	deleterious(0.04)
24:49555783-49555783	MYO5B	825	-	deleterious(0.04)
25:2855291-2855291	ZNF597	351	rs209596436	deleterious(0.02)
25:7668465-7668465	PMM2	149	-	deleterious(0.03)
25:19450164-19450164	-	266	-	deleterious(0.04)
25:22835034-22835034	ZKSCAN2	197	-	deleterious(0.01)
25:26654135-26654135	ITGAL	6	-	deleterious(0.01)
25:36137834-36137834	ZCWPW1	566	-	deleterious(0.02)
26:27912009-27912009	SORCS1	18	-	deleterious(0)
26:27912017-27912017	SORCS1	15	rs476810062	deleterious(0.01)
27:19908305-19908305	MTMR7	177	-	deleterious(0)
27:19908305-19908305	MTMR7	176	-	deleterious(0)
27:34894498-34894498	ADAM18	324	-	deleterious(0.03)
28:35157604-35157604	ANXA11	414	-	deleterious(0.02)
28:35157604-35157604	ANXA11	412	-	deleterious(0.01)
28:39179251-39179251	CDHR1	591	-	deleterious(0.03)
29:26069381-26069381	TMEM86A	97	-	deleterious(0.03)
29:39667571-39667571	-	202	rs469173431	deleterious(0.03)
29:43063268-43063268	CDC42BPG	1359	-	deleterious(0.02)
3:235938-235938	TBX19	352	rs719694580	deleterious(0.01)
3:235938-235938	TBX19	221	rs719694580	deleterious(0)
3:5982286-5982286	NUF2	124	rs464977205	deleterious(0.01)
3:5982286-5982286	NUF2	117	rs464977205	deleterious(0.01)
3:9391728-9391728	COPA	1029	rs463375269	deleterious(0.01)
3:18249363-18249363	-	52	-	deleterious(0.01)
3:70337787-70337787	TNNI3K	614	-	deleterious(0)
3:89224525-89224525	C8A	476	-	deleterious(0.02)
3:89224525-89224525	C8A	469	-	deleterious(0.02)
3:98989114-98989114	STIL	1101	-	deleterious(0.01)
3:99793236-99793236	UQCRH	54	-	deleterious(0)
4:7525292-7525292	ABCA13	1735	-	deleterious(0)
4:7525292-7525292	ABCA13	1767	-	deleterious(0)
4:35595864-35595864	SEMA3D	542	-	deleterious(0.04)
4:87835764-87835764	IQUB	368	rs439919935	deleterious(0.04)
4:107203192-107203192	OR6B1	244	-	deleterious(0.03)
4:112633426-112633426	SSPO	864	-	deleterious(0.01)
5:4783681-4783681	CAPS2	267	-	deleterious(0)
5:30793545-30793545	KMT2D	5441	-	deleterious(0)
5:30793545-30793545	KMT2D	5472	-	deleterious(0)
5:57457977-57457977	SARNP	23	-	deleterious(0.01)
5:80272033-80272033	ERGIC2	277	rs432431323	deleterious(0)
5:98773729-98773729	TAS2R8	16	-	deleterious(0)
6:15450327-15450327	EGF	119	-	deleterious(0)
6:19938074-19938074	TET2	1031	-	deleterious(0.02)
6:21911257-21911257	SLC9B1	233	-	deleterious(0)
6:42031897-42031897	ADGRA3	323	-	deleterious(0)
6:104830411-104830411	LYAR	81	-	deleterious(0)
7:20870073-20870073	ZNF554	258	-	deleterious(0.01)
7:34723535-34723535	DMXL1	302	rs482499100	deleterious(0.04)
7:34723551-34723551	DMXL1	293	-	deleterious(0.01)
7:41323126-41323126	OR2T54	253	-	deleterious(0)
7:49616702-49616702	KIF20A	175	-	deleterious(0)
7:51818787-51818787	HARS2	42	rs109574176	deleterious(0.03)
7:59934235-59934235	HTR4	238	-	deleterious(0.01)
7:59934235-59934235	HTR4	239	-	deleterious(0.01)
7:59934235-59934235	HTR4	224	-	deleterious(0.01)
7:62774933-62774933	FAT2	130	-	deleterious(0)
7:69381704-69381704	CLINT1	618	-	deleterious(0.01)
7:69381704-69381704	CLINT1	582	-	deleterious(0.01)
7:89944908-89944908	-	229	-	deleterious(0.01)
7:90489232-90489232	ADGRV1	5777	rs208565481	deleterious(0.01)
7:108489276-108489276	PJA2	68	-	deleterious(0.02)
7:108489276-108489276	PJA2	57	-	deleterious(0.02)
8:28650422-28650422	CCDC171	398	-	deleterious(0.05)
8:29411933-29411933	FREM1	1581	-	deleterious(0)
8:39893065-39893065	SPATA6L	183	-	deleterious(0.01)
8:39893065-39893065	SPATA6L	217	-	deleterious(0)
8:71012618-71012618	-	69	-	deleterious(0.04)
8:71012648-71012648	-	59	rs133710464	deleterious(0)
8:93893090-93893090	-	62	-	deleterious(0)
9:33280061-33280061	DCBLD1	115	-	deleterious(0.04)
9:40825517-40825517	-	337	-	deleterious(0.01)
9:40825517-40825517	-	348	-	deleterious(0.01)
9:68998905-68998905	EPB41L2	288	-	deleterious(0)
9:90968652-90968652	IPCEF1	45	-	deleterious(0)
X:119116658-119116658	ZFX	391	rs136845354	deleterious(0.01)
X:138524315-138524315	MXRA5	1035	rs482876617	deleterious(0)
