# Supplementary material for: Genomic Diversity Profiling and Breed-Specific Evolutionary Signatures of Selection in Arunachali Yak
Source: Genes (Basel). 2022 Jan 28;13(2):254. doi: 10.3390/genes13020254 (PMC8872319; doi:10.3390/genes13020254)
Supplement: Supplementary file 1 [file genes-13-00254-s001.zip › SUPPLEMENTARY TABLE 5.xlsx]

## Sheet: ALL BTA
CHROMOSOME	REGION_START	REGION_END	NO. OF VARIANTS	PVAL	GENE LIST	GENE START	GENE END
1	150100001	150600000	16	0.000467109	LOC112448308	150366151	150366283
					KCNJ15	150539879	150597398
1	42000001	42500000	1	0.00258467	RIOX2	42194817	42223949
1					GABRR3	42241398	42286990
					ARL6	42010598	42049951
					CRYBG3	42070463	42197661
					OR5AC2	42406455	42407388
					OR5H6	42417292	42418243
					OR5K3	42439997	42440924
1	128100001	128600000	1	0.00307817	CLSTN2	128383076	129107976
					TRIM42	128258494	128288622
1	137600001	138100000	1	0.003971	MIR2288	137823481	137823558
					CPNE4	137662010	138346383
1	35800001	36300000	1	0.00525571	HTR1F	35997345	36011476
1					CGGBP1	36056801	36063383
1					ZNF654	36063774	36150217
1					LOC104970809	36077704	36156487
					C1H3orf38	36147117	36172675
1	126900001	127400000	14	0.00629868	GRK7	127145165	127185456
					TFDP2	126827530	127032524
					ATP1B3	127050088	127096768
					RNF7	127214844	127222231
					RASA2	127342939	127469481
1	55300001	55800000	1	0.00697617	NIL
1	128600001	129100000	15	0.00759478	CLSTN2	128383076	129107976
1	143200001	143700000	1	0.00780261	LOC112448267	143446447	143448311
					PKNOX1	143160261	143204711
					CBS	143219499	143242495
					U2AF1	143261988	143274995
					CRYAA	143317095	143319923
					SIK1	143512560	143523982
					HSF2BP	143641657	143729038
1	124600001	125100000	1	0.00850925	LOC112448367	124815434	124815541
1					DIPK2A	124866091	124888751
1					LOC100847509	124888400	124898118
					SLC9A9	125043184	125706585
1	106100001	106600000	1	0.00953672	B3GALNT1	106346342	106378855
					NMD3	106150165	106186579
					PPM1L	106399685	106576735
2	44800001	45300000	2	0.0020495	NMI	44825910	44846381
					RBM43	44857469	44869115
2	4600001	5100000	3	0.00555084	LIMS2	4842283	4886381
					AMMECR1L	4601029	4621044
					POLR2D	4623449	4635167
					WDR33	4676997	4785534
					SFT2D3	4788152	4792907
					GPR17	4872950	4878988
					MYO7B	4886927	4990144
					IWS1	5012262	5059747
2	7600001	8100000	1	0.00814878	LOC112442304	7802647	7807843
2					GULP1	7886776	8065304
					DIRC1	7681788	7689757
2	64600001	65100000	1	0.0084917	NCKAP5	63770678	64872113
2					LYPD1	64874668	64943609
					GPR39	64934062	65196636
2	122800001	123300000	17	0.00907818	LAPTM5	122807358	122833480
					MATN1	122848309	122860863
3	117200001	117700000	1	1.25639e-05	SCLY	117410466	117440886
3					ESPNL	117440974	117465058
3					KLHL30	117472304	117488039
3					ERFE	117490168	117500140
					LRRFIP1	117074078	117235567
					RBM44	117242780	117271023
					RAMP1	117279463	117320636
					UBE2F	117354034	117399697
					ILKAP	117500083	117526246
					HES6	117549869	117552740
					PER2	117557047	117599734
					TRAF3IP1	117639097	117699434
3	48300001	48800000	1	6.31333e-05	ALG14	48405567	48503990
3					CNN3	48568964	48599127
					SLC44A3	48601013	48687460
3	48400001	48900000	1	0.000121983	SLC44A3	48601013	48687100
					ALG14	48405567	48503990
					CNN3	48568964	48599127
3	34600001	35100000	1	0.000277787	FAM102B	34722417	34804777
3					LOC530689	34844368	34907516
					STXBP3	34568239	34622300
					FNDC7	34626052	34659176
					PRPF38B	34672727	34681344
					HNMT1	34701866	34713620
3	116800001	117300000	1	0.000985888	MLPH	116959513	117005436
3					RAB17	116959513	117005436
3					PRLH	117013541	117014310
3					LRRFIP1	117074078	117235567
					COL6A3	116781706	116872755
					RBM44	117242780	117271023
					RAMP1	117279463	117320636
3	53200001	53700000	1	0.00108033	LRRC8D	53313186	53423873
3					MIR2285K-5	53401643	53401724
3					LOC112445993	53444573	53451171
					ZNF326	53224390	53259732
3	97700001	98200000	18	0.00200398	SPATA6	97776364	97942869
3					SLC5A9	97971698	98001732
					AGBL4	96267286	97722259
					SKINT1	98066622	98090010
3	107500001	108000000	1	0.00205844	POU3F1	107920729	107922878
					UTP11	107941134	107957939
					FHL3	107958889	107967123
					SF3A3	107971382	107997699
3	43900001	44400000	1	0.00297174	LOC112446076	44144499	44144605
3					LOC112445984	44192280	44218150
					PLPPR4	43920846	43935390
					PLPPR5	44218190	44352274
3	13700001	14200000	1	0.00539677	ARHGEF11	13805682	13923887
3					LRRC71	13925503	13938145
3					PEAR1	13938884	13950487
3					NTRK1	13971637	13984798
3					INSRR	13991757	14007718
					ETV3	13730451	13744944
					SH2D2A	14027672	14037570
					PRCC	14042532	14070245
					HDGF	14082646	14091949
					MRPL24	14093619	14098631
					RRNAD1	14098947	14105696
					ISG20L2	14106073	14111435
					CRABP2	14125443	14130428
					NES	14159731	14168452
					BCAN	14176878	14194971
3	87800001	88300000	4	0.00554631	DAB1	87798777	89136080
3	48500001	49000000	2	0.0066568	ALG14	48405567	48503990
					CNN3	48568964	48599127
					SLC44A3	48601013	48687100
					F3	48954584	48965468
					ABCD3	48980772	49070167
3	87600001	88100000	24	0.00720126	DAB1	87798777	89136080
3	7200001	7700000	26	0.00776707	SNORA70-201	7480892	7481028
					NOS1AP	7126369	7467854
					OLFML2B	7530681	7580215
					ATF6	7612097	7846120
3	91300001	91800000	1	0.00894229	TTC22	91489777	91514089
3					PARS2	91528217	91533096
3					TTC4	91538115	91562854
3					MROH7	91567417	91621073
					BSND	91312842	91325905
					TMEM61	91331868	91344823
					DHCR24	91412373	91445021
					LEXM	91452993	91484933
					FAM151A	91637647	91663387
					ACOT11	91703259	91739355
3	107100001	107600000	1	0.00928688	RHBDL2	107046909	107104905
					GJA9	107106896	107110689
					MYCBP	107111984	107117816
					RRAGC	107121919	107136353
4	3700001	4200000	10	0.000142851	ENSBTAT00000081468	3935434	3937316
	60500001	61000000	1	0.000433531	AOAH	60547451	60732291
					ANLN	60770165	60830815
					KIAA0895	60855565	60911817
					EEPD1	60949010	61140568
	8400001	8900000	1	0.000502604	CDK14	7938145	8616503
					FZD1	8665914	8670065
					LOC104971924	8662932	8663524
	47800001	48300000	1	0.00181703	PIK3CG	47988346	48024313
					CCDC71L	47810138	47815184
					PRKAR2B	48154293	48255027
					HBP1	48265378	48296504
					COG5	48296670	48573818
	7300001	7800000	18	0.00571721	ABCA13	7203981	7512121
					UPP1	7619651	7648061
					SUN3	7697474	7745009
					CLDN12	7763038	7773690
	37600001	38100000	2	0.00582717	PCLO	37450401	37842376
	33600001	34100000	1	0.00703917	GRM3	33626560	33877961
					KIAA1324L	33398730	33620931
	105000001	105500000	14	0.007588	CLEC5A	105219593	105232716
					MGAM	105273711	105370152
					TAS2R3	105264582	105265627
					OR9A7	105212444	105213409
					SSBP1	105004038	105014759
					TAS2R4	105049334	105050225
					TAS2R5	105061136	105062014
					PRSS58	105496425	105502562
	35600001	36100000	1	0.0078146	SEMA3D	35390231	35616007
					SEMA3A	36083513	36635794
	110300001	110800000	10	0.00835604	CNTNAP2	109425568	111751018
	111000001	111500000	17	0.00857545	CNTNAP2	109425568	111751018
	30400001	30900000	3	0.00904773	CDCA7L	30692951	30736205
					DNAH11	30335237	30659753
	22700001	23200000	1	0.00920283	DGKB	22386957	23261923
5	4000001	4500000	3	0.00193906	ATXN7L3B	4068534	4072271
					KCNC2	4489047	4726724
5	17800001	18300000	15	0.00433113	C5H12orf50	17793173	17826008
					CEP290	17836736	17895641
					TMTC3	17932896	17984949
					KITLG	18251954	18311647
5	62400001	62900000	1	0.0054939	TMPO	62686654	62700638
					SLC25A3	62746004	62752288
					IKBIP	62757512	62781346
					APAF1	62781940	62871540
					ANKS1B	62888514	63411636
5	96500001	97000000	2	0.00610842	GSG1	96766338	96785806
					EMP1	96632243	96653946
					FAM234B	96786662	96826944
					HEBP1	96875436	96912825
					GPRC5D	96929514	96937903
					GPRC5A	96960381	96980220
5	45500001	46000000	1	0.00613876	IL22	45523408	45529266
					IL26	45548402	45567433
					IFNG	45624512	45629336
5	17500001	18000000	1	0.00667047	CEP290	17836736	17895641
					TMTC3	17932896	17984949
					C5H12orf50	17793173	17826008
5	18600001	19100000	14	0.00742847	NIL
6	69800001	70300000	20	0.000107608	KIT	70166680	70254049
	79100001	79600000	1	0.00075261	NIL
	39800001	40300000	1	0.00511949	SLIT2	39779274	40184422
					MIR218-1	40087129	40087239
					PACRGL	40227760	40249213
					KCNIP4	40250030	41576555
	51000001	51500000	1	0.00557171	NIL
	68200001	68700000	16	0.00588353	RASL11B	68530437	68534897
					SCFD2	68538959	68936021
	69600001	70100000	20	0.00654998	GSX2	69629305	69630906
					PDGFRA	69723777	69771549
	66700001	67200000	9	0.00669761	NIPAL1	66717012	66744153
					SLAIN2	67048534	67120464
					ZAR1	67172270	67186955
					FRYL	67179391	67325259
					TEC	66819042	66974846
					TXK	66754823	66818357
	46600001	47100000	15	0.00676818	NIL
	57100001	57600000	4	0.00764956	PGM2	57145039	57182341
					TBC1D1	57203065	57429959
					LOC112447063	57255702	57265338
	96900001	97400000	1	0.00801748	HNRNPD	97143329	97160508
					HNRNPDL	97209604	97216660
					ENOPH1	97216604	97255726
					TMEM150C	97276658	97387999
	43900001	44400000	1	0.00823686	SOD3	44372153	44393167
					DHX15	44133426	44187399
	24500001	25000000	1	0.00889253	DDIT4L	24526440	24531399
					H2AFZ	24737270	24739542
					DNAJB14	24740524	24778340
					LAMTOR3	24787039	24798441
					DAPP1	24799810	24859481
					C6H4orf54	24973842	24992993
7	76800001	77300000	21	2.63944e-05	NIL
	19000001	19500000	1	6.24018e-05	PTPRS	18936415	19046741
					KDM4B	19095469	19216544
					UHRF1	19223875	19257799
					ARRDC5	19256257	19274364
					PLIN3	19291316	19311895
					TICAM3	19321309	19338346
					FEM1A	19353550	19357132
					DPP9	19428855	19460601
					MYDGF	19470130	19482063
					TNFAIP8L1	19483677	19503073
	106300001	106800000	2	0.000226516	EFNA5	106495873	106785312
	67300001	67800000	1	0.000451718	SGCD	66907513	68019302
	70600001	71100000	1	0.000527767	EBF1	70284252	70694473
					RNF145	70734077	70796784
					UBLCP1	70851228	70871250
					IL12B	70890910	70911817
	76500001	77000000	6	0.00130524	NIL
	68400001	68900000	16	0.00137838	NIL
	75600001	76100000	6	0.00141193	NIL
	1000001	1500000	1	0.00206494	RASGEF1C	1004380	1109795
					RNF130	1184315	1327700
					TBC1D9B	1374528	1415545
					MRNIP	1417993	1435526
					SQSTM1	1435468	1507930
	80400001	80900000	8	0.00218196	WWC1	80336573	80494274
					RARS	80503747	80532990
					FBLL1	80545367	80549606
					ZFYVE16	80568748	80619919
					FAM151B	80632925	80666388
					ANKRD34B	80676425	80694011
					DHFR	80733287	80748878
					MSH3	80748970	80931596
	30700001	31200000	9	0.00235763	PRDM6	30616927	30725193
					PPIC	30779208	30793008
					SNX24	30805563	30899616
					SNX2	30993856	31052612
	72900001	73400000	1	0.00249226	GABRB2	72979170	73272333
	76900001	77400000	11	0.00262439
	80100001	80600000	2	0.00321578	TENM2	79812711	80302321
					WWC1	80336573	80494274
					RARS	80503747	80532990
					FBLL1	80545367	80549606
					ZFYVE16	80568748	80619919
	75700001	76200000	17	0.00448431	NIL
	59200001	59700000	2	0.00527767	SPINK5	59322053	59405624
					SPINK6	59446537	59488546
					SPINK13	59678198	59693275
	78500001	79000000	1	0.00535253	NIL
	16400001	16900000	1	0.00546298	PNPLA6	16399777	16423846
					CAMSAP3	16447903	16464463
					XAB2	16465653	16474535
					PET100	16474578	16476410
					PCP2	16476399	16478344
					STXBP2	16482821	16491428
					RETN	16513167	16514555
					MCEMP1	16521464	16525530
					TRAPPC5	16526002	16528272
					FCER2	16531764	16542197
					CLEC4G	16561210	16564668
					CD209	16586870	16589774
					EVI5L	16608241	16640664
					PRR36	16643422	16656491
					LRRC8E	16653090	16660988
					MAP2K7	16662508	16672289
					TGFBR3L	16671143	16675831
					SNAPC2	16676583	16679417
					CTXN1	16680590	16682154
					TIMM44	16682719	16695710
					MIR2455	16711355	16711431
					ELAVL1	16715066	16752222
					CCL25	16752339	16779698
					FBN3	16781402	16850556
					CERS4	16897964	16933292
	65700001	66200000	1	0.00779899	GALNT10	65477848	65703950
					SAP30L	65722278	65735762
					HAND1	65748836	65752140
					LARP1	65952244	66011210
					CNOT8	66042161	66061078
					FAXDC2	66012816	66042867
					GEMIN5	66064472	66104564
					MRPL22	66108714	66147126
	56100001	56600000	1	0.00854886	PRELID2	56437260	57021312
	75500001	76000000	14	0.00877552	NIL
	74400001	74900000	12	0.00978524
8	900001	1400000	1	0.000502186	PALLD	702624	1067201
8					CBR4	1083271	1107894
8					SH3RF1	1162177	1318000
8					NEK1	1398827	1532675
8	29100001	29600000	13	0.000532283	TTC39B	28971574	29127793
8					FREM1	29275220	29455599
8					CER1	29470913	29474550
8					ZDHHC21	29490397	29565598
8	97000001	97500000	1	0.00692698	RAD23B	97013131	97057377
					KLF4	97174494	97178551
9	7600001	8100000	7	0.0015587	ADGRB3	7360520	8248302
	31400001	31900000	8	0.00351764	MAN1A1	31675671	31849229
	3600001	4100000	1	0.00403706	NIL
	42000001	42500000	1	0.00653558	OSTM1	42052269	42095177
					SEC63	42151795	42219435
					SCML4	42257454	42361821
					SOBP	42406877	42571284
	79600001	80100000	1	0.00746875	GJE1	79615031	79616854
					VTA1	79629596	79700323
					ADGRG6	79769696	79922571
	3300001	3800000	1	0.00817894	NIL
	55800001	56300000	3	0.00836698	NIL
10	3500001	4000000	1	0.00224618	TRIM36	3972431	4004761
10	25000001	25500000	27	0.00242294	NIL
10	32000001	32500000	1	0.00818979	C10H15orf41	32243713	32371315
10	6300001	6800000	1	0.00982089	GCNT4	6500604	6532598
					ANKRD31	6535948	6677221
					HMGCR	6764010	6784641
11	85800001	86300000	34	0.000141333	LPIN1	86081382	86162423
					NTSR2	86217354	86225065
					GREB1	86231435	86316027
	85700001	86200000	14	0.000446683	LPIN1	86081382	86162423
	9400001	9900000	19	0.000495218	TACR1	9482071	9671576
					POLE4	9706385	9717914
					HK2	9741444	9810551
	54300001	54800000	1	0.0012676	CTNNA2	54799094	56160072
	56500001	57000000	11	0.00223642	REG3G	56606754	56609713
					REG3A	56716799	56719619
	16600001	17100000	18	0.00274643	NIL
	9700001	10200000	1	0.00605728	POLE4	9706385	9717914
					HK2	9741444	9810551
					SEMA4F	9961639	9986310
					M1AP	9989544	10084934
					DOK1	10085658	10087949
					LOXL3	10089219	10107284
					HTRA2	10107232	10110539
					AUP1	10110567	10113599
					DQX1	10113748	10120754
					TLX2	10122553	10123956
					PCGF1	10130550	10132864
					LBX2	10138388	10140044
					TTC31	10142827	10151725
					CCDC142	10151566	10158324
					MRPL53	10159212	10162300
					MOGS	10164072	10167847
					WBP1	10168027	10170419
					RTKN	10170660	10201731
					INO80B	10170952	10173677
	44400001	44900000	3	0.00636082	SH3RF3	44340280	44503120
					EDAR	44555164	44607352
					CCDC138	44616603	44646559
					RANBP2	44646693	44708488
					LIMS1	44713825	44796651
					GCC2	44806991	44840325
					SULTIC4	44861266	44872988
	21300001	21800000	1	0.00859761	SOS1	21303806	21435072
					CDKL4	21494120	21549052
					MAP4K3	21552844	21736090
	22600001	23100000	9	0.00866736	SLC8A1	22407414	22787389
	85600001	86100000	13	0.00949611	LPIN1	86081382	86162423
12	29100001	29600000	2	0.000374831	RXFP2	29212313	29274747
					LOC788183	29553177	29598164
	29200001	29700000	6	0.00117799	RXFP2	29212313	29274747
					LOC788183	29553177	29598164
					MIR2299	29635267	29635346
	73100001	73600000	15	0.00157999	DNAJC3	73095398	73160534
					UGGT2	73168437	73313745
					HS6ST3	73363795	74076341
	63700001	64200000	1	0.00168885	NIL
	1600001	2100000	1	0.00323139	TDRD3	1575111	1813786
	53500001	54000000	1	0.00433055	POUF41	53742084	53746809
					RNF219	53756335	53801246
	24800001	25300000	7	0.00655018	RFXAP	24805678	24815774
					SERTM1	24901132	24926099
					CCNA1	25107044	25118257
					SPART	25176435	25208299
					CCDC169	25208934	25240514
					SOHLH2	25262596	25303215
	78500001	79000000	1	0.00719238	FGF14	78130313	78765008
					TPP2	78857738	78915646
					METTL21C	78920519	78931943
					CCDC168	78966025	79004941
	55700001	56200000	2	0.0084141	NIL
	73400001	73900000	11	0.00858867	HS6ST3	73363795	74076341
13	68500001	69000000	2	0.000832467	NIL
13	11400001	11900000	20	0.00121823	CCDC3	11479615	11570661
13					CAMK1D	11668381	12062761
13	54400001	54900000	6	0.00370021	BHLHE23	54422515	54424820
13					SLC17A9	54445528	54460005
13					GID8	54464732	54470860
13					DIDO1	54471076	54521932
13					TCFL5	54528126	54545393
13					COL9A3	54545394	54565468
13					OGFR	54566991	54574602
13					MRGBP	54576865	54581460
13					NTSR1	54609114	54658410
13					GATA5	54799158	54809119
13					SLCO4A1	54671704	54695830
13					RBBP8NL	54837559	54850086
13					CABLES2	54853834	54866384
13					RPS21	54866478	54867739
13					LAMA5	54887633	54939286
13	6000001	6500000	12	0.0044408	NIL
13	33200001	33700000	1	0.00512917	EPC1	33129721	33227587
13					KIF5B	33326442	33374419
13					ARHGAP12	33421094	33539282
13	54200001	54700000	17	0.00743182	GID8	54464732	54470860
13					DIDO1	54471076	54521932
13					TCFL5	54528126	54545393
13					COL9A3	54545394	54565468
13					OGFR	54566991	54574602
13					MRGBP	54576865	54581460
13					NTSR1	54609114	54658410
13					SLCO4A1	54671704	54695830
13					KCNQ2	54171404	54219709
13					CHRNA4	54243156	54256031
13					COL20A1	54261187	54284395
13					ARFGAP1	54287340	54297713
13					NKAIN4	54301969	54309296
13					BIRC7	54318944	54322315
13					YTHDF1	54332710	54345507
13					BHLHE23	54422515	54424820
13					SLC17A9	54445528	54460005
13	45300001	45800000	1	0.0079491	NIL
13	77800001	78300000	1	0.00873341	B4GALT5	77733103	77810227
13					SLC9A8	77898630	77973809
13					SPATA2	77982557	77993066
13					RNF114	77993256	78017912
13					SNAI1	78036444	78042572
13					UBE2V1	78114950	78125211
13					TMEM189	78152541	78178493
13					CEBPB	78205756	78206803
13	6400001	6900000	1	0.0091286	SPTLC3	6599445	6751436
13					ISM1	6817181	6909121
13	45900001	46400000	1	0.0099069	ADARB2	46039692	46272683
13					WDR37	46287763	46322645
13					IDI1	46325274	46328402
13					GTPBP4	46331626	46346321
13					LARP4B	46389833	46480612
14	51500001	52000000	10	0.000384535	nil
14	28400001	28900000	14	0.00220622	nil
14	70000001	70500000	1	0.00276792	GEM	70066768	70080794
14					CDH17	70118145	70207102
14					PDP1	70358929	70367467
14					TMEM67	70467825	70513844
14	35300001	35800000	13	0.00287581	MSC	35439964	35441975
14					TRPA1	35611175	35666932
14	54300001	54800000	10	0.00419288	KCNV1	54486975	54498196
14					SYBU	54704495	54833840
14	45500001	46000000	14	0.0041992	SAMD12	45625074	46074096
14					MIR2489	45940447	45940525
14	50100001	50600000	21	0.008761	NIL
15	19300001	19800000	1	0.00563148	C15H11orf87	19329468	19336445
15	15000001	15500000	2	0.00576604	SESN3	15192597	15271904
15					ENDOD1	15326367	15361768
15					CWC15	15447186	15456214
15	56900001	57400000	21	0.00755213	ANO3	57063260	57350902
15					MUC15	57270886	57284150
15					SLC5A12	57364695	57415989
15	32500001	33000000	1	0.00767194	MIR125B-1	32763900	32763988
					MIRLET7A-2	32812702	32812774
					MIR100	32818527	32818603
16	15100001	15600000	20	0.00121252	BRINP3	15141935	15631043
16	31900001	32400000	1	0.00279375	KIF26B	31619746	32144466
16					EFCAB2	32201886	32314431
16	72800001	73300000	2	0.00926945	HHAT	72644406	73012760
					SERTAD4	73094209	73105682
					SYT14	73163217	73371280
17	14000001	14500000	16	8.49716e-05	GYPA	14040367	14066548
17					GYPB	14115217	14143540
17					FREM3	14228748	14337667
17					SMARCA5	14342537	14380115
17					GAB1	14421813	14549193
17	33100001	33600000	1	0.000570423	ANKRD50	33129810	33170654
17	32700001	33200000	1	0.000823324	ANKRD50	33129810	33170654
17	12100001	12600000	28	0.00345627	REELD1	12114931	12129728
17					LSM6	12162215	12177198
17					ZNF827	12387549	12581094
17					C17H4orf51	12583406	12633783
17	29800001	30300000	1	0.00422631	HSPA4L	29812717	29876398
17					SLC25A31	29880312	29908490
17					INTU	29911061	30002979
17	13900001	14400000	8	0.00595884	GYPA	14040367	14066548
17					GYPB	14115217	14143540
17					FREM3	14228748	14337667
17					SMARCA5	14342537	14380115
17	14100001	14600000	10	0.00646354	GYPB	14115217	14143540
17					FREM3	14228748	14337667
17					SMARCA5	14342537	14380115
17					GAB1	14421813	14549193
17	63200001	63700000	1	0.00660154	OASL	63195317	63211740
17					ANKRD13A	63266229	63300392
17					GIT2	63304645	63333700
17					TCHP	63350074	63365037
17					GLTP	63377006	63399503
17					TRPV4	63410068	63448313
17					FAM222A	63458108	63488141
17					MVK	63609601	63628609
17					UBE3B	63650233	63696698
17					KCTD10	63696947	63726375
17	2400001	2900000	1	0.0090318	RBM46	2540687	2585674
17					LRAT	2668448	2675094
17					FGG	2840701	2848782
					FGA	2860737	2868865
					FGB	2893366	2902370
18	28700001	29200000	1	0.0019075	NIL
18	20100001	20600000	2	0.00385132	NIL
18	40400001	40900000	1	0.00397171	CCNE1	40423582	40435551
18					URI1	40542850	40605028
18					ZNF536	40772863	41222795
18	14800001	15300000	14	0.00854099	SHCBP1	14881868	14919139
18					VPS35	14984964	15012555
18					ORC6	15012738	15021379
18					MYLK3	15032401	15081935
18	41300001	41800000	1	0.00933689	NIL
18	8300001	8800000	1	0.00962524	PLCG2	8313674	8471052
					SDR42E1	8543652	8557088
					HSD17B2	8586155	8679914
					MPHOSPH6	8717273	8729011
19	24100001	24600000	1	0.00398934	OR1E1	24119695	24120767
19					SPATA22	24197778	24212643
19					ASPA	24214200	24235467
19					TRPV3	24239067	24273735
19					TRPV1	24278398	24307361
19					SHPK	24321971	24339677
19					CTNS	24339839	24357248
19					TAX1BP3	24360138	24365315
19					EMC6	24365490	24366341
19					P2RX5	24368860	24381944
19					ITGAE	24389248	24452858
19					HASPIN	24398954	24401941
19					NCBP3	24463109	24488614
19					CAMKK3	24494919	24523050
19					P2RX1	24527446	24547076
19					ATP2A3	24551812	24585890
19	47600001	48100000	1	0.00541223	TANC2	47400815	47764657
19					CYB561	47767170	47779083
19					ACE	47798611	47819218
19					ACE3	47827665	47840921
19					KCNH6	47841567	47864805
19					DCAF7	47867639	47894383
19					TACO1	47902088	47906269
19					MAP3K3	47913099	47973785
19					LIMD2	47975187	47978519
19					STRADA	47980017	48008083
19					CCDC47	48012882	48032907
19					DDX42	48033492	48069343
19					FTSJ3	48069134	48077245
19					PSMC5	48077621	48082211
19					SMARCD2	48082270	48091877
19					TCAM1	48097788	48108407
19	46900001	47400000	1	0.00760357	TLK2	46911551	47035468
19					MRC2	47043141	47103169
					MARCH10	47110509	47211461
20	4900001	5400000	1	0.00108692	NKX2-5	4910308	4913387
					STC2	5000471	5011125
					BOD1	5319515	5331743
	52900001	53400000	1	0.00165892	CDH18	53333335	53936991
	67100001	67600000	8	0.00182326	NIL
	16700001	17200000	9	0.00220342	IPO11	16791867	16972465
					DIMT1	17008066	17018596
					KIF2A	17021526	17049655
	51200001	51700000	1	0.00366359	CDH12	51192126	51567420
	56700001	57200000	1	0.00436147	ZNF622	56692056	56705774
					MARCH11	56953216	57071178
	63300001	63800000	14	0.00589817	TAS2R1	63557627	63558518
					SEMA5A	63654414	64222832
	23500001	24000000	1	0.0067342	SLC38A9	23441008	23536100
					PLPP1	23636325	23740314
					MTREX	23738858	23830099
					DHX29	23830148	23877461
					CCNO	23900827	23903878
					MCIDAS	23907672	23914345
					CDC20B	23940883	24005261
					GPX8	24005261	23956371
	63800001	64300000	7	0.00819348	SEMA5A	63654414	64222832
	41000001	41500000	4	0.00871307	SUB1	41067801	41089687
					ZFR	41213947	41297707
					MTMR12	41323054	41391744
					GOLPH3	41439629	41491579
	37000001	37500000	1	0.00887152	NUP155	36974358	37024105
					CPLANE1	37042086	37118638
					NIPBL	37164879	37370342
	27000001	27500000	3	0.00962546	NIL
21	40800001	41300000	1	0.00369681	G2E3	41189333	41265104
					SCFD1	41268752	41381795
	21900001	22400000	1	0.00826568	BLM	21840562	21933849
					CRTC3	21989951	22085993
					IQZAP1	22107089	22214192
					ZNF774	22234279	22243623
					ZSCAN2	22276430	22286794
					WDR73	22300561	22315962
					NMB	22316079	22319406
					SEC11A	22328980	22362040
					ZNF592	22396854	22446777
	7700001	8200000	1	0.00856696	IGF1R	7780292	8080394
					PGPEP1L	8090746	8162342
					FAM169B	8189592	8265059
	59500001	60000000	1	0.00935481	GSC	59627999	59629562
					DICER1	59952095	60027390
22	17600001	18100000	1	0.00181163	RAD18	17583248	17694054
22					OXTR	17769774	17832707
22					CAV3	17791383	17805131
22					SSUH2	17832368	17875124
22					LMCD1	17919338	17976355
22	12300001	12800000	1	0.00243177	SCN11A	12235886	12325303
22					WDR48	12377232	12429959
22					GORASP1	12429898	12441067
22					TTC21A	12441370	12475857
22					CSRNP1	12478904	12487319
22					XIRP1	12509226	12518446
22					CX3CR1	12569450	12583388
22					CCR8	12590657	12636482
22					SLC25A38	12645739	12660609
22					RPSA	12684197	12697683
22					MOBP	12723743	12758060
22					BLOC1S3	12765639	12768755
22	37400001	37900000	5	0.00468402	PSMD6	37420697	37439307
22					ATXN7	37466802	37500914
22					THOC7	37600284	37619864
22					C22H3orf49	37620013	37719715
22					SNTN	37750447	37764990
22					SYNPR	37781486	38082185
22	41700001	42200000	18	0.00934839	NIL
23	48100001	48600000	1	3.35268e-05	RREB1	48048381	48155041
					LY86	48528634	48570547
	4000001	4500000	19	0.000162593	COL21A1	4026181	4261772
					BMP5	4470531	4614743
	38800001	39300000	2	0.000184315	RNF144B	39178907	39266796
	36100001	36600000	8	0.00179634	SOX4	36517934	36522532
	4500001	5000000	1	0.0020464	HMGCLL1	4789430	4989143
					BMP5	4470531	4614743
	1500001	2000000	1	0.00385686	NIL
	36200001	36700000	2	0.00748587	SOX4	36517934	36522532
	9000001	9500000	1	0.00860539	ANKS1A	8896252	9065275
					TCP11	9078651	9110714
					SCUBE3	9192521	9224880
					ZNF76	9239711	9269829
					DEF6	9271536	9298623
					PPARD	9304223	9389913
					FANCE	9415908	9424660
					RPL10A	9426024	9428500
					TEAD3	9433298	9456216
					TULP1	9457479	9471815
	35300001	35800000	4	0.0095053	PRL	35332692	35341308
					HDGF11	35662145	35664136
24	50700001	51200000	1	0.00310601	NIL
24	28500001	29000000	6	0.007379	CDH2	28655755	28904115
25	22800001	23300000	1	0.00234871	AQP8	22801764	22811949
25					ZKSCAN2	22823162	22836634
25					HS3ST4	23299462	23796747
25	15200001	15700000	18	0.00927769	XYLT1	15541427	15893697
26	39900001	40400000	14	0.00249233	INPPF5	39852055	39946253
26					MCMBP	39946840	39976702
26					SEC23IP	39998355	40041185
26	1600001	2100000	8	0.00378055	NIL
26	32800001	33300000	1	0.00502329	TECTB	32805336	32834014
26					ACSL5	32906448	32957884
26					ZDHHC6	32961572	32975059
26					VTI1A	32976921	33227833
26	17800001	18300000	18	0.00530582	TLL2	17701671	17846185
26					TM9SF3	17851538	17912665
26					LCOR	18133233	18266773
26					SLIT1	18272318	18444379
27	40900001	41400000	1	0.00219421	NIL
27	34600001	35100000	1	0.0049933	ADAM2	34592556	34690873
					ADAM3A	34708240	34822441
					IDO1	35027442	35040352
					IDO2	35048649	35114702
27	22500001	23000000	1	0.00788453	NIL
28	24800001	25300000	1	0.00568498	RUFY2	24762519	24807123
					DNA2	24811834	24849259
					SLC25A16	24856927	24885916
					TET1	24907387	25034819
					CCAR1	25046796	25093472
					STOX1	25111883	25171619
					DDX50	25178283	25211518
					DDX21	25219710	25243113
					KIF1BP	25248019	25302698
28	22300001	22800000	1	0.0086239	CTNNA3	22274689	24179824
29	4000001	4500000	15	0.00133703	NIL
29	10200001	10700000	1	0.00423979	DLG2	9932886	12255824
