# Supplementary material for: Genomic Diversity Profiling and Breed-Specific Evolutionary Signatures of Selection in Arunachali Yak
Source: Genes (Basel). 2022 Jan 28;13(2):254. doi: 10.3390/genes13020254 (PMC8872319; doi:10.3390/genes13020254)
Supplement: Supplementary file 1 [file genes-13-00254-s001.zip › SUPPLEMENTARY TABLE 6.xlsx]

## Sheet: BTA1
BTA	QTL SEARCH START	QTL SEARCH ENDS	QTL ID	QTL NAME	QTL REGION
1	35800001	36300000	QTL:10640	Body weight (mature)	Chr.1:25117557-36259610 bp
			QTL:9947	Infectious bovine keratoconjunctivitis susceptibility	Chr.1:29031921-73165945 bp
			QTL:3439	Conception rate	Chr.1:25344370-70216318 bp
1	42000001	42500000	QTL:21533	Milk alpha-casein percentage	Chr.1:34048514-96156452 bp
			QTL:12227	Linolenic acid content	Chr.1:25117557-48441931 bp
			QTL:12228	Polyunsaturated fatty acid content	Chr.1:25117557-48441931 bp
			QTL:3586	Structural soundness (legs, feet, penis, and prepuce)	Chr.1:50970957-56697437 bp
1	55300001	55800000	QTL:3439	Conception rate	Chr.1:25344370-70216318 bp
1	106100001	106600000	QTL:106678	Milk yield	Chr.1:105965618-106514910 bp
1	124600001	125100000	QTL:156855	Feet and leg conformation	Chr.1:124004158-124996466 bp
			QTL:178077	Somatic cell score	Chr.1:124043522-125641702 bp
1	126900001	127400000	QTL:157056	Subcutaneous fat	Chr.1:127376990-127377030 bp
1	128100001	129100000	QTL:154092	Stature	Chr.1:128839101-128839141 bp
			QTL:62354	Fertility index	Chr.1:128128973-129128826 bp
			QTL:178035	Somatic cell score	Chr.1:128092950-129007020 bp
1	137600001	138100000	QTL:154052	Dry matter intake	Chr.1:138014376-138014416 bp
			QTL:28495	Residual feed intake	Chr.1:137963305-137963345 bp
			QTL:15164	Birth index	Chr.1:137718422-140276805 bp
			QTL:15165	Calving ease	Chr.1:137718422-140276805 bp
			QTL:15166	Calf size	Chr.1:137718422-140276805 bp
1	143200001	143700000	QTL:96142	Bovine tuberculosis susceptibility	Chr.1:143587378-143587418 bp
			QTL:214969	Milk yield	Chr.1:143615536-143711195 bp
1	150100001	150600000	QTL:36679	Lean meat yield	Chr.1:150397325-150397365 bp

## Sheet: BTA2
BTA	QTL SEARCH START	QTL SEARCH ENDS	QTL ID	QTL NAME	QTL REGION
2	44800001	45300000	QTL:12152	Lung percentage	Chr.2:3033483-67663650 bp
			QTL:12219	Tick resistance	Chr.2:28387240-45646093 bp
			QTL:16040	Somatic cell score	Chr.2:42613384-66206914 bp
			QTL:1678	Calving ease	Chr.2:43430199-49295365 bp
2	4600001	5100000	QTL:135851	Tick resistance	Chr.2:4057133-4958110 bp
			QTL:10655	Carcass weight	Chr.2:2726911-5274035 bp
			QTL:2757	Kidney, pelvic, and heart fat percentage	Chr.2:2726911-5274035 bp
			QTL:1554	Strength	Chr.2:2726911-6527213 bp
			QTL:12152	Lung percentage	Chr.2:3033483-67663650 bp
2	7600001	8100000	QTL:12152	Lung percentage	Chr.2:3033483-67663650 bp
			QTL:4857	Kidney, pelvic, and heart fat percentage	Chr.2:5704346-14389811 bp
			QTL:151891	Intramuscular fat	Chr.2:7676682-7676722 bp
			QTL:1550	Body form composite index	Chr.2:6527213-17953475 bp
2	64600001	65100000	QTL:16040	Somatic cell score	Chr.2:42613384-66206914 bp
			QTL:12152	Lung percentage	Chr.2:3033483-67663650 bp
			QTL:3580	Structural soundness (legs, feet, penis, and prepuce)	Chr.2:54426732-70705995 bp
			QTL:11659	M. paratuberculosis susceptibility	Chr.2:64679122-64898978 bp
2	122800001	123300000	QTL:24068	Muscle zinc content	Chr.2:123152276-123990664 bp
			QTL:135875	Tick resistance	Chr.2:123152276-123990664 bp

## Sheet: BTA3
BTA	QTL SEARCH START	QTL SEARCH ENDS	QTL ID	QTL NAME	QTL REGION
3	7200001	7700000	QTL:24711	Body weight (weaning)	Chr.3:20-58306271 bp
3	13700001	14200000	QTL:166792	Withers height	Chr.3:14175693-14175733 bp
			QTL:166793	Hip height	Chr.3:14175693-14175733 bp
			QTL:166797	Body length	Chr.3:14177113-14177153 bp
			QTL:39751	Udder height	Chr.3:14084711-14084751 bp
			QTL:39752	Rump width	Chr.3:14084711-14084751 bp
			QTL:39753	Somatic cell score	Chr.3:14084711-14084751 bp
			QTL:39754	Stature	Chr.3:14084711-14084751 bp
			QTL:39755	Strength	Chr.3:14084711-14084751 bp
			QTL:1326	Body weight (birth)	Chr.3:12289014-30150558 bp
3	34600001	35100000	QTL:10689	Body weight (weaning)	Chr.3:31518704-40633135 bp
			QTL:10688	Height (mature)	Chr.3:31518704-40633135 bp
3	43900001	44400000	QTL:10694	Body weight (mature)	Chr.3:40633135-56210430 bp
			QTL:10693	Body weight (birth)	Chr.3:40633135-48578288 bp
			QTL:1352	Kidney, pelvic, and heart fat percentage	Chr.3:37279925-50679768 bp
			QTL:10691	Height (mature)	Chr.3:40633135-48578288 bp
			QTL:24711	Body weight (weaning)	Chr.3:20-58306271 bp
			QTL:177667	Somatic cell score	Chr.3:43157454-44364191 bp
3	48300001	49000000	QTL:10692	Body weight (yearling)	Chr.3:40633135-48578288 bp
			QTL:10691	Height (mature)	Chr.3:40633135-48578288 bp
			QTL:5328	Residual feed intake	Chr.3:48568228-48769426 bp
			QTL:1352	Kidney, pelvic, and heart fat percentage	Chr.3:37279925-50679768 bp
			QTL:10694	Body weight (mature)	Chr.3:40633135-56210430 bp
			QTL:10693	Body weight (birth)	Chr.3:40633135-48578288 bp
3	53200001	53700000	QTL:10694	Body weight (mature)	Chr.3:40633135-56210430 bp
			QTL:5267	Residual feed intake	Chr.3:47662837-57953232 bp
			QTL:66165	Immunoglobulin G level	Chr.3:53364912-53566110 bp
			QTL:1556	Foot angle	Chr.3:53636529-53641559 bp
3	87600001	88300000	QTL:166876	Conformation score	Chr.3:88010321-88040365 bp
			QTL:30797	Body weight (birth)	Chr.3:86454284-97532603 bp
			QTL:15171	Calf size	Chr.3:84669155-102513835 bp
			QTL:15172	Calving index	Chr.3:84669155-102513835 bp
			QTL:131433	Hip height	Chr.3:87809899-87809939 bp
3	91300001	91800000	QTL:164806	Clinical mastitis	Chr.3:91429008-91429048 bp
			QTL:40098	Somatic cell score	Chr.3:91524290-91524330 bp
			QTL:121495	Luteal activity	Chr.3:91514719-91514759 bp
3	97700001	98200000	QTL:15171	Calf size	Chr.3:84669155-102513835 bp
			QTL:151640	Muscle carnosine content	Chr.3:97850146-97850186 bp
3	107100001	108000000	QTL:96199	Bovine tuberculosis susceptibility	Chr.3:107405214-107405254 bp
			QTL:193774	Body weight (yearling)	Chr.3:107082578-107188510 bp
			QTL:40228	Strength	Chr.3:107830396-107830436 bp
			QTL:40217	Foot angle	Chr.3:107830396-107830436 bp
			QTL:40224	Rear leg placement - side view	Chr.3:107830396-107830436 bp
			QTL:40226	Somatic cell score	Chr.3:107830396-107830436 bp
3	116800001	117700000	QTL:154106	Stature	Chr.3:117467441-117467481 bp
			QTL:106629	Body weight (weaning)	Chr.3:117005567-121128372 bp

## Sheet: BTA4
BTA	QTL SEARCH START	QTL SEARCH ENDS	QTL ID	QTL NAME	QTL REGION
4	3700001	4200000	QTL:1557	Body depth	Chr.4:333501-7544277 bp
			QTL:213404	Body weight (birth)	Chr.4:3910027-4912963 bp
			QTL:2544	Average daily gain	Chr.4:819326-22428899 bp
	7300001	7800000	QTL:66167	Immunoglobulin G level	Chr.4:6109693-27301240 bp
			QTL:10705	Height (mature)	Chr.4:7544277-9378176 bp
			QTL:66168	Immunoglobulin G level	Chr.4:6109693-27301240 bp
			QTL:2730	Somatic cell score	Chr.4:7544277-28268762 bp
			QTL:10704	Body weight (birth)	Chr.4:6109693-7544277 bp
	8400001	8900000	QTL:66167	Immunoglobulin G level	Chr.4:6109693-27301240 bp
			QTL:10705	Height (mature)	Chr.4:7544277-9378176 bp
			QTL:7065	Bone percentage	Chr.4:6109693-27301240 bp
			QTL:2730	Somatic cell score	Chr.4:7544277-28268762 bp
	30400001	30900000	QTL:124008	Body weight (weaning)	Chr.4:30834662-30834702 bp
			QTL:124021	Average daily gain	Chr.4:30834662-30834702 bp
			QTL:10709	Height (yearling)	Chr.4:10994551-32226979 bp
			QTL:10708	Body weight (weaning)	Chr.4:10994551-35086352 bp
			QTL:66170	FMDV peptide-induced cell proliferation	Chr.4:27301240-49089582 bp
			QTL:7129	Social separation--Vocalization	Chr.4:27301240-49089582 bp
			QTL:7130	Social separation--Standing alert	Chr.4:27301240-49089582 bp
	33600001	34100000	QTL:40383	Strength	Chr.4:33659786-33659826 bp
			QTL:10708	Body weight (weaning)	Chr.4:10994551-35086352 bp
			QTL:66170	FMDV peptide-induced cell proliferation	Chr.4:27301240-49089582 bp
			QTL:7129	Social separation--Vocalization	Chr.4:27301240-49089582 bp
			QTL:7130	Social separation--Standing alert	Chr.4:27301240-49089582 bp
	35600001	36100000	QTL:37346	Eye area pigmentation	Chr.4:35939851-35939891 bp
			QTL:15723	Body weight (slaughter)	Chr.4:32307573-41993317 bp
			QTL:66170	FMDV peptide-induced cell proliferation	Chr.4:27301240-49089582 bp
			QTL:7129	Social separation--Vocalization	Chr.4:27301240-49089582 bp
			QTL:7130	Social separation--Standing alert	Chr.4:27301240-49089582 bp
	37600001	38100000	QTL:25188	Body weight (birth)	Chr.4:37443799-37652649 bp
			QTL:25189	Body weight (6 months)	Chr.4:37443799-37652649 bp
			QTL:66170	FMDV peptide-induced cell proliferation	Chr.4:27301240-49089582 bp
			QTL:7129	Social separation--Vocalization	Chr.4:27301240-49089582 bp
			QTL:7130	Social separation--Standing alert	Chr.4:27301240-49089582 bp
	47800001	48300000	QTL:10714	Body weight (birth)	Chr.4:45683774-50238254 bp
			QTL:2491	Clinical mastitis	Chr.4:41993317-52365079 bp
			QTL:10715	Body weight (yearling)	Chr.4:45683774-50238254 bp
	60500001	61000000	QTL:10719	Height (yearling)	Chr.4:59098090-65730546 bp
			QTL:10515	Parasites mean of natural logarithm	Chr.4:52086851-65753914 bp
	105000001	105500000	QTL:164357	Body weight (birth)	Chr.4:105359154-105359194 bp
	110300001	110800000	QTL:67031	Body weight (yearling)	Chr.4:110627121-110627161 bp
	111000001	111500000	QTL:65436	Maturity rate	Chr.4:111101734-111101774 bp
			QTL:23666	Dry matter intake	Chr.4:111094893-111094933 bp
			QTL:32189	Body weight	Chr.4:110808062-111451031 bp
	22700001	23200000	QTL:66167	Immunoglobulin G level	Chr.4:6109693-27301240 bp
			QTL:1558	Stature	Chr.4:9378176-23420934 bp
			QTL:2730	Somatic cell score	Chr.4:7544277-28268762 bp
			QTL:10712	Height (mature)	Chr.4:10994551-32226979 bp
			QTL:10711	Body weight (weaning)	Chr.4:19135469-32226979 bp

## Sheet: BTA5
BTA	QTL SEARCH START	QTL SEARCH ENDS	QTL ID	QTL NAME	QTL REGION
5	4000001	4500000	QTL:67161	Body weight (yearling)	Chr.5:4356737-4356777 bp
			QTL:67162	Body weight gain	Chr.5:4356737-4356777 bp
			QTL:1742	Somatic cell count	Chr.5:4402641-4584201 bp
			QTL:3398	Average daily gain	Chr.5:1647486-4493421 bp
5	17500001	18300000	QTL:21151	Eye area pigmentation	Chr.5:18206797-18206837 bp
			QTL:9915	Tick resistance	Chr.5:8992231-66095214 bp
			QTL:37668	Body weight (birth)	Chr.5:14369249-36339251 bp
			QTL:4975	Somatic cell score	Chr.5:15032793-19689049 bp
			QTL:10727	Height (mature)	Chr.5:13686385-18418132 bp
			QTL:4413	Residual feed intake	Chr.5:17602965-17784525 bp
5	18600001	19100000	QTL:178946	Bovine tuberculosis susceptibility	Chr.5:18586765-18650948 bp
			QTL:193812	Body weight (18 months)	Chr.5:18940413-19018750 bp
			QTL:3575	Structural soundness (legs, feet, penis, and prepuce)	Chr.5:18699549-30384533 bp
			QTL:37668	Body weight (birth)	Chr.5:14369249-36339251 bp
			QTL:4975	Somatic cell score	Chr.5:15032793-19689049 bp
			QTL:9915	Tick resistance	Chr.5:8992231-66095214 bp
5	45500001	46000000	QTL:4622	Stature	Chr.5:37410452-57693952 bp
			QTL:4627	Body weight (birth)	Chr.5:37410452-57693952 bp
			QTL:4686	Body size	Chr.5:37410452-57693952 bp
			QTL:40920	Strength	Chr.5:45655488-45655528 bp
			QTL:66171	ConA-induced cell proliferation	Chr.5:37410452-47593384 bp
			QTL:10737	Body weight (yearling)	Chr.5:45632540-53514476 bp
			QTL:10738	Height (mature)	Chr.5:42512367-57693952 bp
			QTL:10736	Height (yearling)	Chr.5:45632540-53514476 bp
			QTL:9915	Tick resistance	Chr.5:8992231-66095214 bp
5	62400001	62900000	QTL:3422	Rump length	Chr.5:30311820-73496359 bp
			QTL:3424	Rump width	Chr.5:34925534-71284303 bp
			QTL:3445	Chest depth	Chr.5:57693952-74404157 bp
			QTL:66172	ConA-induced cell proliferation	Chr.5:57966291-70777853 bp
			QTL:10745	Height (mature)	Chr.5:58307144-65732095 bp
			QTL:10747	Body weight (mature)	Chr.5:58307144-70777853 bp
			QTL:10746	Body weight (weaning)	Chr.5:58307144-70777853 bp
			QTL:67112	Body weight (yearling)	Chr.5:62882604-62882644 bp
			QTL:67113	Body weight gain	Chr.5:62882604-62882644 bp
			QTL:62357	Fertility index	Chr.5:61407644-62407443 bp
			QTL:9915	Tick resistance	Chr.5:8992231-66095214 bp
5	96500001	97000000	QTL:139857	Young stock survival	Chr.5:96736634-96736674 bp
			QTL:169902	M. paratuberculosis susceptibility	Chr.5:96254052-99194836 bp

## Sheet: BTA6
BTA	QTL SEARCH START	QTL SEARCH ENDS	QTL ID	QTL NAME	QTL REGION
6	24500001	25000000	QTL:24751	Body weight (weaning)	Chr.6:0-37983812 bp
			QTL:24535	Body weight (birth)	Chr.6:0-40983913 bp
			QTL:12153	Kidney, pelvic, and heart fat percentage	Chr.6:3390665-51352653 bp
			QTL:2493	Clinical mastitis	Chr.6:9283340-33227425 bp
			QTL:24790	Body weight (yearling)	Chr.6:20-43935864 bp
			QTL:5378	Body weight (birth)	Chr.6:10628300-32285654 bp
			QTL:10427	Body weight (slaughter)	Chr.6:9722751-27908647 bp
			QTL:10767	Height (yearling)	Chr.6:16113352-24922895 bp
			QTL:66176	FMDV peptide-induced cell proliferation	Chr.6:24922895-34006178 bp
			QTL:10439	Somatic cell score	Chr.6:4380012-65653453 bp
	39800001	40300000	QTL:5272	Residual feed intake	Chr.6:32418399-52732848 bp
			QTL:12153	Kidney, pelvic, and heart fat percentage	Chr.6:3390665-51352653 bp
			QTL:193882	Body weight (yearling)	Chr.6:39521986-39932557 bp
			QTL:164615	Body weight (birth)	Chr.6:39816113-39816153 bp
			QTL:189717	Metabolic body weight	Chr.6:39874311-39874351 bp
			QTL:183361	Dry matter intake	Chr.6:39949526-39949566 bp
			QTL:185769	Average daily gain	Chr.6:39949526-39949566 bp
			QTL:154598	Bone weight	Chr.6:39989848-39989888 bp
			QTL:66591	Body weight gain	Chr.6:39837045-39837085 bp
			QTL:6172	Somatic cell score	Chr.6:39945978-40127088 bp
			QTL:1384	Structural soundness (legs, feet, penis, and prepuce)	Chr.6:33170005-45940647 bp
	43900001	44400000	QTL:5272	Residual feed intake	Chr.6:32418399-52732848 bp
			QTL:12153	Kidney, pelvic, and heart fat percentage	Chr.6:3390665-51352653 bp
			QTL:185497	Average daily gain	Chr.6:44139922-44139962 bp
			QTL:183491	Dry matter intake	Chr.6:44192012-44192052 bp
			QTL:189463	Metabolic body weight	Chr.6:44355517-44355557 bp
			QTL:66578	Body weight (birth)	Chr.6:44115607-44115647 bp
			QTL:67732	Body weight gain	Chr.6:44115607-44115647 bp
			QTL:62358	Fertility index	Chr.6:43012003-43998190 bp
			QTL:126852	Calving to conception interval	Chr.6:43931134-47878515 bp
			QTL:1384	Structural soundness (legs, feet, penis, and prepuce)	Chr.6:33170005-45940647 bp
	46600001	47100000	QTL:12153	Kidney, pelvic, and heart fat percentage	Chr.6:3390665-51352653 bp
			QTL:185497	Average daily gain	Chr.6:44139922-44139962 bp
			QTL:164619	Body weight (birth)	Chr.6:46820035-46820075 bp
			QTL:164679	Body weight (yearling)	Chr.6:46820035-46820075 bp
			QTL:185791	Average daily gain	Chr.6:46871396-46871436 bp
			QTL:126852	Calving to conception interval	Chr.6:43931134-47878515 bp
			QTL:12009	Calving interval	Chr.6:46560819-46741928 bp
			QTL:12010	Interval to first estrus after calving	Chr.6:46560819-46741928 bp
			QTL:5388	Gestation length	Chr.6:32690064-51216821 bp
			QTL:10439	Somatic cell score	Chr.6:4380012-65653453 bp
	51000001	51500000	QTL:5272	Residual feed intake	Chr.6:32418399-52732848 bp
			QTL:4977	Clinical mastitis	Chr.6:50534735-65653453 bp
			QTL:12153	Kidney, pelvic, and heart fat percentage	Chr.6:3390665-51352653 bp
			QTL:67268	Body weight (birth)	Chr.6:51273758-51273798 bp
			QTL:67269	Body weight (yearling)	Chr.6:51273758-51273798 bp
			QTL:67483	Body weight gain	Chr.6:51456433-51456473 bp
			QTL:4690	Interval to first estrus after calving	Chr.6:50787697-65653453 bp
			QTL:10774	Height (mature)	Chr.6:45940647-53095068 bp
			QTL:5388	Gestation length	Chr.6:32690064-51216821 bp
			QTL:10439	Somatic cell score	Chr.6:4380012-65653453 bp
	57100001	57600000	QTL:4977	Clinical mastitis	Chr.6:50534735-65653453 bp
			QTL:66460	Body weight (birth)	Chr.6:57104421-57104461 bp
			QTL:67405	Body weight (yearling)	Chr.6:57104421-57104461 bp
			QTL:67406	Body weight gain	Chr.6:57104421-57104461 bp
			QTL:32393	Somatic cell score	Chr.6:57562312-57562352 bp
	66700001	67200000	QTL:138557	Conception rate	Chr.6:66209350-67193418 bp
			QTL:65469	Maturity rate	Chr.6:66900320-66900360 bp
			QTL:67662	Body weight (birth)	Chr.6:67105966-67106006 bp
			QTL:67663	Body weight gain	Chr.6:67105966-67106006 bp
	68200001	68700000	QTL:170023	Interval to first estrus after calving	Chr.6:67286349-68546212 bp
			QTL:124019	Body weight (yearling)	Chr.6:68410468-68410508 bp
	69600001	70300000	QTL:66537	Body weight (yearling)	Chr.6:69639864-69639904 bp
			QTL:67627	Body weight (birth)	Chr.6:69639864-69639904 bp
			QTL:67628	Body weight gain	Chr.6:69639864-69639904 bp
			QTL:37348	Eye area pigmentation	Chr.6:69807007-69807047 bp
			QTL:37364	Facial pigmentation	Chr.6:69807007-69807047 bp
	79100001	79600000	QTL:137481	Clinical mastitis	Chr.6:79460714-79460754 bp
			QTL:37395	Eye area pigmentation	Chr.6:79203323-79203363 bp
			QTL:37302	Bovine viral diarrhea virus susceptibility	Chr.6:79389362-79389402 bp
	96900001	97400000	QTL:178080	Somatic cell score	Chr.6:97174252-98054956 bp
			QTL:65236	Body weight (mature)	Chr.6:97178667-97178707 bp

## Sheet: BTA7
BTA	QTL SEARCH START	QTL SEARCH ENDS	QTL ID	QTL NAME	QTL REGION
7	1000001	1500000	QTL:181233	Conception rate	Chr.7:1053434-1053474 bp
			QTL:181476	Inseminations per conception	Chr.7:1053434-1053474 bp
			QTL:213432	Hemoglobin	Chr.7:971984-1887948 bp
			QTL:160100	Bovine respiratory disease susceptibility	Chr.7:1433977-1434017 bp
			QTL:106634	Body weight (weaning)	Chr.7:88847-3187460 bp
	16400001	16900000	QTL:5377	Gestation length	Chr.7:7039598-22791240 bp
			QTL:164680	Body weight (yearling)	Chr.7:16634808-16634848 bp
			QTL:178961	Bovine tuberculosis susceptibility	Chr.7:16689904-16733735 bp
			QTL:166782	Body length	Chr.7:16878562-16878602 bp
			QTL:5274	Residual feed intake	Chr.7:5438434-26399889 bp
			QTL:3537	Somatic cell score	Chr.7:7081101-22650129 bp
			QTL:9927	Sperm motility	Chr.7:14211588-37171410 bp
			QTL:4866	Kidney, pelvic, and heart fat percentage	Chr.7:7081101-22650129 bp
			QTL:9916	Tick resistance	Chr.7:2035167-58369259 bp
	19000001	19500000	QTL:212168	First service conception	Chr.7:19341814-19341854 bp
			QTL:212607	Inseminations per conception	Chr.7:19341814-19341854 bp
			QTL:5274	Residual feed intake	Chr.7:5438434-26399889 bp
			QTL:67832	Body weight (yearling)	Chr.7:19220934-19220974 bp
			QTL:10788	Height (mature)	Chr.7:17345770-23405570 bp
			QTL:4866	Kidney, pelvic, and heart fat percentage	Chr.7:7081101-22650129 bp
			QTL:9916	Tick resistance	Chr.7:2035167-58369259 bp
			QTL:31181	Cold tolerance	Chr.7:17086793-88971675 bp
	30700001	31200000	QTL:9927	Sperm motility	Chr.7:14211588-37171410 bp
			QTL:164732	Clinical mastitis	Chr.7:31002332-31002372 bp
			QTL:164266	Body weight (birth)	Chr.7:31136158-31136198 bp
			QTL:28115	Body capacity	Chr.7:30964519-30964559 bp
			QTL:10516	PCVF minus PCVM	Chr.7:26366686-38034678 bp
			QTL:10517	Body weight (mean)	Chr.7:26366686-38034678 bp
			QTL:10518	Percentage decrease in body weight up to day 150 after challenge	Chr.7:26366686-38034678 bp
			QTL:10519	Parasites natural logarithm of mean number	Chr.7:26366686-38034678 bp
			QTL:10520	Parasite detection rate	Chr.7:26366686-38034678 bp
			QTL:9916	Tick resistance	Chr.7:2035167-58369259 bp
			QTL:7132	Social separation--Vocalization	Chr.7:14535314-49039346 bp
			QTL:10794	Body weight (weaning)	Chr.7:27437470-33416156 bp
			QTL:31181	Cold tolerance	Chr.7:17086793-88971675 bp
	56100001	56600000	QTL:10807	Body weight (yearling)	Chr.7:54839121-58867298 bp
			QTL:3582	Structural soundness (legs, feet, penis, and prepuce)	Chr.7:51103828-58369259 bp
			QTL:10808	Body weight (weaning)	Chr.7:54839121-58867298 bp
			QTL:3440	Conception rate	Chr.7:50138650-63169369 bp
			QTL:10810	Body weight (birth)	Chr.7:54839121-67327176 bp
			QTL:14847	M. paratuberculosis susceptibility	Chr.7:56130526-56130566 bp
			QTL:9916	Tick resistance	Chr.7:2035167-58369259 bp
			QTL:31181	Cold tolerance	Chr.7:17086793-88971675 bp
			QTL:43089	Stature	Chr.7:56152282-56152322 bp
			QTL:43090	Strength	Chr.7:56152282-56152322 bp
			QTL:66183	FMDV peptide-induced cell proliferation	Chr.7:49039346-58867298 bp
	59200001	59700000	QTL:18761	Body weight (weaning)	Chr.7:59116318-59282330 bp
			QTL:18762	Body weight (18 months)	Chr.7:59116318-59282330 bp
			QTL:20753	Insulin-like growth factor 1 level	Chr.7:59116318-59282330 bp
			QTL:101355	Overall impression, sensory panel	Chr.7:59116318-59282330 bp
			QTL:31181	Cold tolerance	Chr.7:17086793-88971675 bp
			QTL:181773	Muscularity	Chr.7:59001306-59984877 bp
	65700001	66200000	QTL:10810	Body weight (birth)	Chr.7:54839121-67327176 bp
			QTL:10813	Height (mature)	Chr.7:64165448-69026040 bp
			QTL:31181	Cold tolerance	Chr.7:17086793-88971675 bp
			QTL:212619	Inseminations per conception	Chr.7:66177134-66177174 bp
	67300001	67800000	QTL:10814	Body weight (yearling)	Chr.7:67327176-69026040 bp
			QTL:10813	Height (mature)	Chr.7:64165448-69026040 bp
			QTL:31181	Cold tolerance	Chr.7:17086793-88971675 bp
			QTL:212621	Inseminations per conception	Chr.7:67341413-67341453 bp
	68400001	68900000	QTL:10814	Body weight (yearling)	Chr.7:67327176-69026040 bp
			QTL:10813	Height (mature)	Chr.7:64165448-69026040 bp
			QTL:31181	Cold tolerance	Chr.7:17086793-88971675 bp
	70600001	71100000	QTL:31181	Cold tolerance	Chr.7:17086793-88971675 bp
			QTL:57616	Bovine respiratory disease susceptibility	Chr.7:70776239-70776279 bp
	72900001	73400000	QTL:31181	Cold tolerance	Chr.7:17086793-88971675 bp
			QTL:167884	Bovine tuberculosis susceptibility	Chr.7:73255220-73255260 bp
			QTL:43266	Rump width	Chr.7:73155924-73155964 bp
			QTL:43267	Stature	Chr.7:73155924-73155964 bp
			QTL:43268	Strength	Chr.7:73155924-73155964 bp
			QTL:43278	Rear leg placement - rear view	Chr.7:73370297-73370337 bp
	74400001	74900000	QTL:31181	Cold tolerance	Chr.7:17086793-88971675 bp
	75500001	76000000	QTL:31181	Cold tolerance	Chr.7:17086793-88971675 bp
			QTL:212623	Inseminations per conception	Chr.7:75618672-75618712 bp
			QTL:212177	First service conception	Chr.7:75775248-75775288 bp
			QTL:67934	Body weight (birth)	Chr.7:75730621-75730661 bp
			QTL:67936	Body weight gain	Chr.7:75760049-75760089 bp
			QTL:29961	Age at puberty	Chr.7:75728652-75728692 bp
	75600001	76200000	QTL:31181	Cold tolerance	Chr.7:17086793-88971675 bp
			QTL:212623	Inseminations per conception	Chr.7:75618672-75618712 bp
			QTL:212177	First service conception	Chr.7:75775248-75775288 bp
			QTL:67934	Body weight (birth)	Chr.7:75730621-75730661 bp
			QTL:67936	Body weight gain	Chr.7:75760049-75760089 bp
			QTL:29961	Age at puberty	Chr.7:75728652-75728692 bp
	76500001	77000000	QTL:31181	Cold tolerance	Chr.7:17086793-88971675 bp
	76800001	77400000	QTL:31181	Cold tolerance	Chr.7:17086793-88971675 bp
			QTL:178963	Bovine tuberculosis susceptibility	Chr.7:76983679-77118545 bp
	78500001	79000000	QTL:31181	Cold tolerance	Chr.7:17086793-88971675 bp
	80100001	80900000	QTL:31181	Cold tolerance	Chr.7:17086793-88971675 bp
			QTL:181238	Conception rate	Chr.7:80634304-80634344 bp
			QTL:181479	Inseminations per conception	Chr.7:80634304-80634344 bp
	106300001	106800000

## Sheet: BTA8
BTA	QTL SEARCH START	QTL SEARCH ENDS	QTL ID	QTL NAME	QTL REGION
8	900001	1400000	QTL:56475	Average daily gain	Chr.8:20855-996693 bp
			QTL:137211	Bovine respiratory disease susceptibility	Chr.8:221881-991739 bp
			QTL:22903	Heifer pregnancy	Chr.8:357078-977328 bp
			QTL:166725	Metritis	Chr.8:679513-1604017 bp
			QTL:212632	Inseminations per conception	Chr.8:1285049-1285089 bp
			QTL:10821	Body weight (weaning)	Chr.8:1125331-4784514 bp
			QTL:10820	Height (mature)	Chr.8:1125331-9317219 bp
8	29100001	29600000	QTL:20997	Average daily feed intake	Chr.8:27779096-29831030 bp
			QTL:21056	Residual feed intake	Chr.8:27779096-29831030 bp
			QTL:2497	Clinical mastitis	Chr.8:17368223-43382038 bp
			QTL:62061	Sperm motility	Chr.8:29464704-29464744 bp
			QTL:10825	Body weight (birth)	Chr.8:15196699-29543811 bp
			QTL:10828	Height (mature)	Chr.8:24157132-29543811 bp
			QTL:2498	Somatic cell count	Chr.8:17368223-43382038 bp
			QTL:10830	Height (yearling)	Chr.8:24157132-29543811 bp
			QTL:1684	Structural soundness (legs, feet, penis, and prepuce)	Chr.8:29546559-42545408 bp
8	97000001	97500000	QTL:212193	First service conception	Chr.8:97074234-97074274 bp
			QTL:212651	Inseminations per conception	Chr.8:97074234-97074274 bp
			QTL:154145	Stature	Chr.8:97448641-97448681 bp

## Sheet: BTA9
BTA	QTL SEARCH START	QTL SEARCH ENDS	QTL ID	QTL NAME	QTL REGION
9	3300001	4100000	QTL:4981	Clinical mastitis	Chr.9:1381092-10862130 bp
			QTL:68056	Body weight (yearling)	Chr.9:3971102-3971142 bp
			QTL:178359	Somatic cell score	Chr.9:3524770-5021874 bp
			QTL:10845	Body weight (mature)	Chr.9:120498-3630945 bp
			QTL:3565	Inseminations per conception	Chr.9:2704462-43806597 bp
			QTL:3566	Non-return rate	Chr.9:2704462-43806597 bp
	7600001	8100000	QTL:4981	Clinical mastitis	Chr.9:1381092-10862130 bp
			QTL:3565	Inseminations per conception	Chr.9:2704462-43806597 bp
			QTL:3566	Non-return rate	Chr.9:2704462-43806597 bp
			QTL:5279	Residual feed intake	Chr.9:5803533-12440486 bp
			QTL:177068	Conception rate	Chr.9:8008186-8008226 bp
			QTL:35222	Dry matter intake	Chr.9:8000493-8996276 bp
	31400001	31900000	QTL:68050	Body weight gain	Chr.9:31510517-31510557 bp
			QTL:68072	Body weight (yearling)	Chr.9:31782042-31782082 bp
			QTL:10085	Clinical mastitis	Chr.9:19427112-46882684 bp
			QTL:10293	Non-return rate	Chr.9:30894099-74904058 bp
			QTL:4483	Average daily gain	Chr.9:25535272-46587158 bp
			QTL:1745	General disease susceptibility	Chr.9:26685911-43806597 bp
			QTL:66185	FMDV peptide-induced cell proliferation	Chr.9:26685911-48031700 bp
			QTL:3565	Inseminations per conception	Chr.9:2704462-43806597 bp
			QTL:3566	Non-return rate	Chr.9:2704462-43806597 bp
	42000001	42500000	QTL:10085	Clinical mastitis	Chr.9:19427112-46882684 bp
			QTL:10293	Non-return rate	Chr.9:30894099-74904058 bp
			QTL:4483	Average daily gain	Chr.9:25535272-46587158 bp
			QTL:1745	General disease susceptibility	Chr.9:26685911-43806597 bp
			QTL:10859	Body weight (mature)	Chr.9:40823417-49563648 bp
			QTL:66185	FMDV peptide-induced cell proliferation	Chr.9:26685911-48031700 bp
			QTL:3565	Inseminations per conception	Chr.9:2704462-43806597 bp
			QTL:3566	Non-return rate	Chr.9:2704462-43806597 bp
	55800001	56300000	QTL:15919	Body depth	Chr.9:56290638-56475934 bp
			QTL:15920	Stature	Chr.9:56290638-56475934 bp
			QTL:15921	Rump width	Chr.9:56290638-56475934 bp
			QTL:15922	Chest width	Chr.9:56290638-56475934 bp
			QTL:1744	Somatic cell count	Chr.9:56010152-56195448 bp
			QTL:10862	Body weight (mature)	Chr.9:49563648-62622162 bp
			QTL:10293	Non-return rate	Chr.9:30894099-74904058 bp
			QTL:10087	Clinical mastitis	Chr.9:46882684-62622162 bp
			QTL:65972	Body weight	Chr.9:55828194-55828234 bp
			QTL:22830	Average daily gain	Chr.9:55828214-55980280 bp
			QTL:126859	Interval from first to last insemination	Chr.9:53479823-59589272 bp
	79600001	80100000	QTL:130924	Metabolic body weight	Chr.9:79764872-79764912 bp
			QTL:108888	Milk beta-lactoglobulin percentage	Chr.9:79839055-79839095 bp
			QTL:161592	Clinical mastitis	Chr.9:79238565-80257157 bp

## Sheet: BTA10
BTA	QTL SEARCH START	QTL SEARCH ENDS	QTL ID	QTL NAME	QTL REGION
10	3500001	4000000	QTL:5007	Veterinary treatments	Chr.10:2620760-9809546 bp
			QTL:10864	Body weight (birth)	Chr.10:3311181-9809546 bp
			QTL:30513	Calving ease	Chr.10:2541230-3691643 bp
			QTL:213144	Dry matter intake	Chr.10:3004311-3691643 bp
			QTL:10866	Height (mature)	Chr.10:3311181-16735732 bp
			QTL:44320	Feet and leg conformation	Chr.10:3892927-3892967 bp
			QTL:44324	Stature	Chr.10:3892927-3892967 bp
			QTL:62065	Sperm motility	Chr.10:3892927-3892967 bp
			QTL:178974	Bovine tuberculosis susceptibility	Chr.10:3952296-4077902 bp
			QTL:4692	Angularity	Chr.10:2620760-10323420 bp
	6300001	6800000	QTL:5007	Veterinary treatments	Chr.10:2620760-9809546 bp
			QTL:10864	Body weight (birth)	Chr.10:3311181-9809546 bp
			QTL:10866	Height (mature)	Chr.10:3311181-16735732 bp
			QTL:213160	Feed efficiency	Chr.10:6018257-7329188 bp
			QTL:213143	Dry matter intake	Chr.10:6617470-7427251 bp
	25000001	25500000	QTL:179231	Age at puberty	Chr.10:22278002-26325867 bp
			QTL:30515	Calf size	Chr.10:21516136-26431631 bp
			QTL:1580	Strength	Chr.10:14747559-30687885 bp
			QTL:10872	Body weight (mature)	Chr.10:23207053-38433107 bp
			QTL:10873	Body weight (yearling)	Chr.10:16735732-38433107 bp
			QTL:1578	Body depth	Chr.10:14747559-30687885 bp
			QTL:2704	Non-return rate	Chr.10:22939631-40797089 bp
			QTL:2701	Somatic cell count	Chr.10:22939631-40797089 bp
	32000001	32500000	QTL:177681	Somatic cell score	Chr.10:31364551-32389035 bp
			QTL:68187	Body weight gain	Chr.10:32409961-32410001 bp
			QTL:68174	Body weight (yearling)	Chr.10:32485691-32485731 bp
			QTL:125869	Feet and leg conformation	Chr.10:32485691-32485731 bp
			QTL:125934	Foot angle	Chr.10:32485691-32485731 bp
			QTL:2704	Non-return rate	Chr.10:22939631-40797089 bp
			QTL:2701	Somatic cell count	Chr.10:22939631-40797089 bp
			QTL:12221	Tick resistance	Chr.10:30687885-60832142 bp

[truncated: 19 more sheets: BTA11, BTA12, BTA13, BTA14, BTA15, BTA16, BTA17, BTA18, BTA19, BTA20, BTA21, BTA22, BTA23, BTA24, BTA25, BTA26, BTA27, BTA28, BTA29]
